# Supplementary material for: Connecting energetic nitropyrazole and aminotetrazole moieties with N,N′-ethylene bridges: A promising approach for fine tuning energetic properties
Source: Royal Society of Chemistry journal article supplement (doi:10.1039/c6ta02387h), 2016-01-01
Supplement: c6ta02387h1.pdf [file c6ta02387h1.pdf]

## Electronic Supplementary Information

Connecting Energetic Nitropyrazole and Aminotetrazole Moieties with N,N'-Ethylene Bridges: A Promising Approach for Fine Tuning Energetic Properties of Compounds

Dheeraj Kumar, Chunlin He, Lauren A. Mitchell, Damon A. Parrish and Jean'ne M. Shreeve\*

### Table of contents

|    |                                                                                     |     |
|----|-------------------------------------------------------------------------------------|-----|
| 1. | Isodesmic Reactions                                                                 | S2  |
| 2. | Crystal Structures of compounds <b>5</b> , <b>9</b> ·H <sub>2</sub> O and <b>12</b> | S3  |
| 3. | Crystal Structure data                                                              | S4  |
| 4. | NMR spectra                                                                         | S13 |

# 1. Isodesmic Reactions

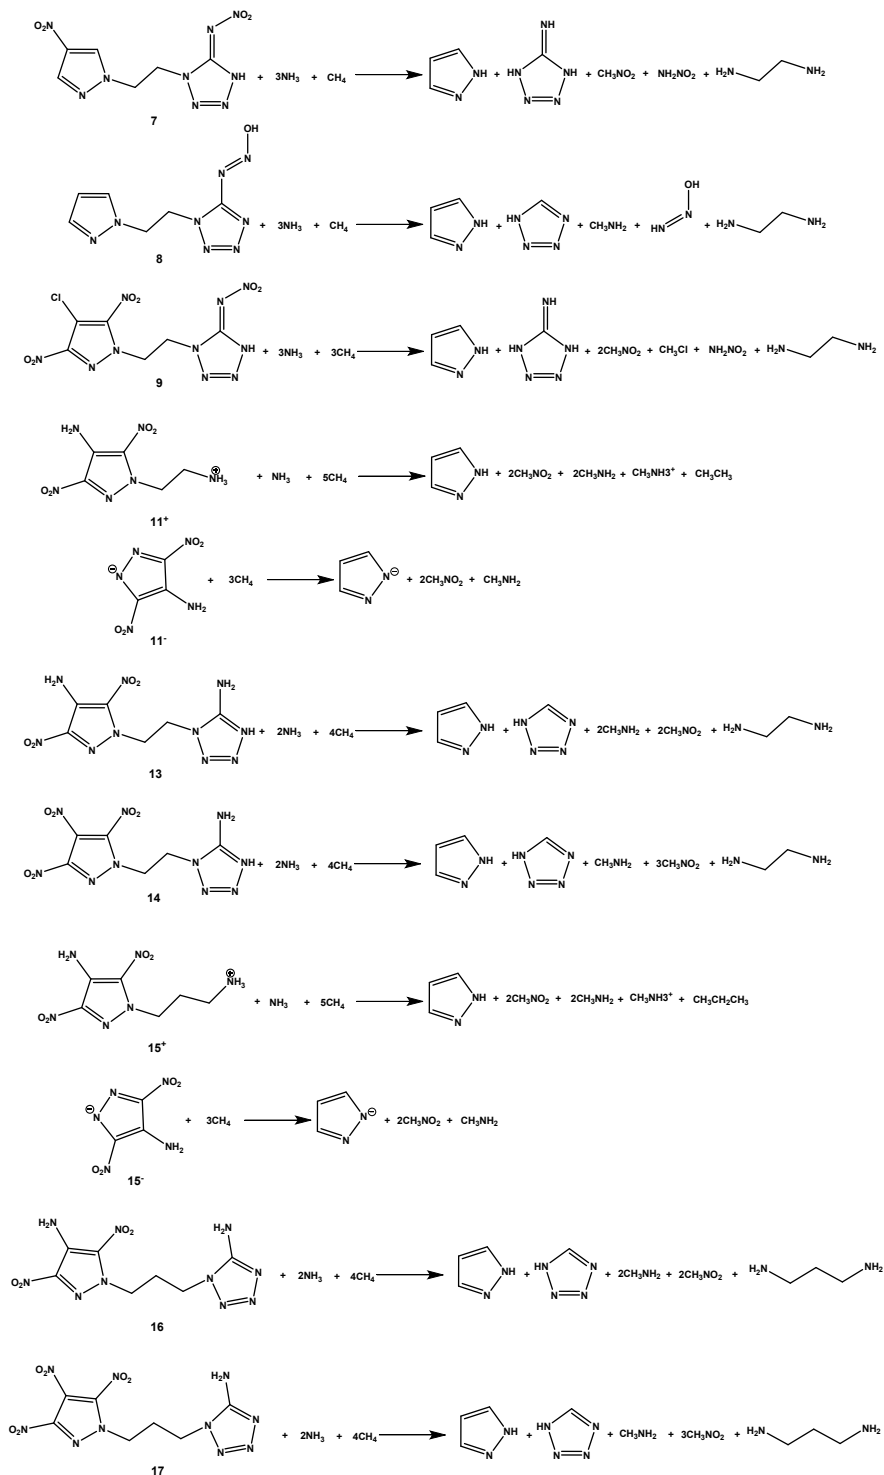

Scheme S1: Isodesmic reactions for the synthesized compounds

## 2. Crystal Structures of compounds 5, 9·H<sub>2</sub>O and 12

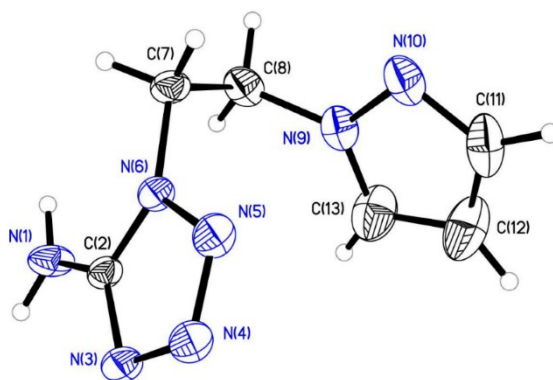

**Figure S1.** Thermal ellipsoid plot (50%) and labeling scheme for **5**

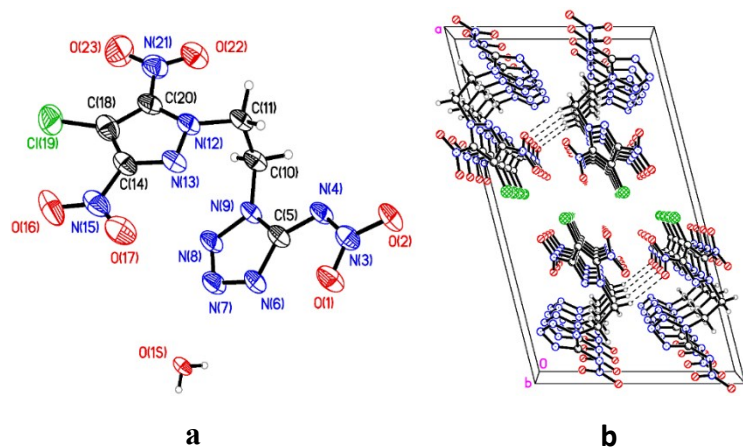

**Figure S2.** (a) Thermal ellipsoid plot (50%) and labeling scheme for **9·H<sub>2</sub>O**. (b) Ball-and-stick packing diagram of **9·H<sub>2</sub>O** viewed down the *b* axis. Dashed lines indicate strong hydrogen bonding.

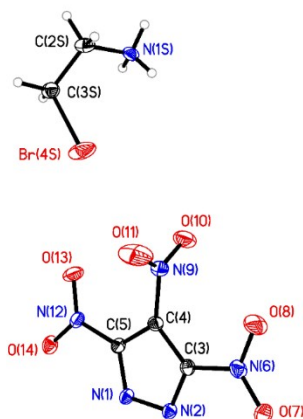

**Figure S3.** Thermal ellipsoid plot (50%) and labeling scheme for **12**.

### 3. Crystal Structure Data

**Table S1.** X-ray crystal structure parameters of compounds **5**, **7**, **9**, **12** and **13**.

| Parameters                                                    | <b>5</b>                                     | <b>7·H<sub>2</sub>O</b>                                     | <b>8</b>                                       | <b>9·H<sub>2</sub>O</b>                                        | <b>12</b>                                                     | <b>13</b>                                                    |
|---------------------------------------------------------------|----------------------------------------------|-------------------------------------------------------------|------------------------------------------------|----------------------------------------------------------------|---------------------------------------------------------------|--------------------------------------------------------------|
| CCDC number                                                   | 1454188                                      | 1454189                                                     | 1454190                                        | 1454191                                                        | 1454192                                                       | 1454193                                                      |
| Formula                                                       | C <sub>6</sub> H <sub>9</sub> N <sub>7</sub> | C <sub>6</sub> H <sub>9</sub> N <sub>9</sub> O <sub>5</sub> | C <sub>6</sub> H <sub>8</sub> N <sub>8</sub> O | C <sub>6</sub> H <sub>6</sub> ClN <sub>10</sub> O <sub>7</sub> | C <sub>5</sub> H <sub>7</sub> BrN <sub>6</sub> O <sub>6</sub> | C <sub>6</sub> H <sub>8</sub> N <sub>10</sub> O <sub>4</sub> |
| MW                                                            | 179.20                                       | 287.22                                                      | 208.20                                         | 365.66                                                         | 327.08                                                        | 284.22                                                       |
| cryst syst                                                    | monoclinic                                   | monoclinic                                                  | monoclinic                                     | monoclinic                                                     | monoclinic                                                    | triclinic                                                    |
| Space group                                                   | P2 <sub>1</sub> /c                           | P2 <sub>1</sub> /c                                          | P2 <sub>1</sub> /c                             | P2 <sub>1</sub> /c                                             | P2 <sub>1</sub> /c                                            | <b>PError!</b>                                               |
| <i>a</i> /Å                                                   | 5.388(3)                                     | 13.624(4)                                                   | 6.794(3)                                       | 20.688(4)                                                      | 8.668(2)                                                      | 7.105(2)                                                     |
| <i>b</i> /Å                                                   | 29.349(2)                                    | 8.667(3)                                                    | 16.520(7)                                      | 5.487(1)                                                       | 9.223(2)                                                      | 9.063(3)                                                     |
| <i>c</i> /Å                                                   | 5.948(2)                                     | 10.397(3)                                                   | 8.397(4)                                       | 12.004(2)                                                      | 14.411(3)                                                     | 17.442(5)                                                    |
| α (°)                                                         | 90.00                                        | 90.00                                                       | 90.00                                          | 90.00                                                          | 90.00                                                         | 93.227(2)                                                    |
| β (°)                                                         | 113.925(2)                                   | 109.82(1)                                                   | 98.104(2)                                      | 104.552(1)                                                     | 103.053(2)                                                    | 100.858(2)                                                   |
| γ (°)                                                         | 90.00                                        | 90.00                                                       | 90.00                                          | 90.00                                                          | 90.00                                                         | 92.641(2)                                                    |
| <i>V</i> /Å <sup>3</sup>                                      | 859.68(8)                                    | 1155.00(6)                                                  | 932.96(7)                                      | 1318.8(4)                                                      | 1122.30(4)                                                    | 1099.42(6)                                                   |
| <i>Z</i>                                                      | 4                                            | 4                                                           | 4                                              | 4                                                              | 4                                                             | 2                                                            |
| <i>T</i> /K                                                   | 296(2)                                       | 296(2)                                                      | 296(2)                                         | 150(2)                                                         | 150(2)                                                        | 150(2)                                                       |
| λ /Å                                                          | 0.71073                                      | 0.71073                                                     | 0.71073                                        | 1.54178                                                        | 0.71073                                                       | 1.54178                                                      |
| ρ <sub>c</sub> (g/cm <sup>3</sup> )                           | 1.385                                        | 1.652                                                       | 1.482                                          | 1.784                                                          | 1.889                                                         | 1.675                                                        |
| μ (mm <sup>-1</sup> )                                         | 0.099                                        | 0.143                                                       | 0.113                                          | 3.228                                                          | 3.698                                                         | 1.270                                                        |
| Goodness of fit                                               | 1.054                                        | 0.972                                                       | 1.049                                          | 1.136                                                          | 1.086                                                         | 1.020                                                        |
| θ range                                                       | 3.81 - 26.52                                 | 2.83 - 26.54                                                | 3.03 - 27.59                                   | 2.21 - 66.97                                                   | 3.27 - 27.52                                                  | 2.58 - 66.61                                                 |
| Total reflections                                             | 8071                                         | 10873                                                       | 9660                                           | 5815                                                           | 10798                                                         | 6472                                                         |
| Unique reflections                                            | 1767                                         | 2372                                                        | 2152                                           | 2141                                                           | 2579                                                          | 3385                                                         |
| Observed data [ <i>I</i> > 2σ( <i>I</i> )]                    | 1262                                         | 1859                                                        | 1386                                           | 1574                                                           | 2374                                                          | 2246                                                         |
| R <sub>int</sub>                                              | 0.0406                                       | 0.0254                                                      | 0.0335                                         | 0.0639                                                         | 0.0203                                                        | 0.0397                                                       |
| R <sub>1</sub> , wR <sub>2</sub> [ <i>I</i> > 2σ( <i>I</i> )] | 0.0492, 0.1102                               | 0.0363, 0.1040                                              | 0.0371, 0.0891                                 | 0.0743, 0.1752                                                 | 0.0228, 0.0538                                                | 0.0571, 0.1364                                               |
| R <sub>1</sub> , wR <sub>2</sub> (all data)                   | 0.0778, 0.1209                               | 0.0501, 0.1149                                              | 0.0726, 0.1011                                 | 0.1011, 0.1893                                                 | 0.0256, 0.0551                                                | 0.0958, 0.1620                                               |

$$R_1 = \frac{\sum |F_o| - |F_c|}{\sum |F_o|}; \quad wR_2 = \frac{\sum (|F_o|^2 - |F_c|^2)^2}{\sum |F_o|^2}^{1/2}$$

**Table S2.** Bond lengths [Å] and angles [°] for compound **5**.

|                   |            |                   |            |
|-------------------|------------|-------------------|------------|
| N(1)-C(2)         | 1.338(2)   | (1)-H(1A)         | 0.85(2)    |
| N(1)-H(1B)        | 0.88(2)    | C(2)-N(3)         | 1.327(2)   |
| C(2)-N(6)         | 1.343(2)   | N(3)-N(4)         | 1.369(2)   |
| N(4)-N(5)         | 1.281(2)   | N(5)-N(6)         | 1.369(2)   |
| N(6)-C(7)         | 1.453(2)   | C(7)-C(8)         | 1.508(3)   |
| C(7)-H(7A)        | 0.9700     | C(7)-H(7B)        | 0.9700     |
| C(8)-N(9)         | 1.447(3)   | C(8)-H(8A)        | 0.9700     |
| C(8)-H(8B)        | 0.9700     | N(9)-C(13)        | 1.332(3)   |
| N(9)-N(10)        | 1.347(2)   | N(10)-C(11)       | 1.324(3)   |
| C(11)-C(12)       | 1.364(4)   | C(11)-H(11)       | 0.9300     |
| C(12)-C(13)       | 1.358(4)   | C(12)-H(12)       | 0.9300     |
| C(13)-H(13)       | 0.9300     |                   |            |
|                   |            |                   |            |
| C(2)-N(1)-H(1A)   | 118.8(16)  | C(2)-N(1)-H(1B)   | 117.9(15)  |
| H(1A)-N(1)-H(1B)  | 123(2)     | N(3)-C(2)-N(1)    | 126.21(18) |
| N(3)-C(2)-N(6)    | 108.82(15) | N(1)-C(2)-N(6)    | 124.97(17) |
| C(2)-N(3)-N(4)    | 105.11(15) | N(5)-N(4)-N(3)    | 111.94(15) |
| N(4)-N(5)-N(6)    | 106.03(15) | C(2)-N(6)-N(5)    | 108.09(14) |
| C(2)-N(6)-C(7)    | 130.14(15) | N(5)-N(6)-C(7)    | 121.27(15) |
| N(6)-C(7)-C(8)    | 111.40(15) | N(6)-C(7)-H(7A)   | 109.3      |
| C(8)-C(7)-H(7A)   | 109.3      | N(6)-C(7)-H(7B)   | 109.3      |
| C(8)-C(7)-H(7B)   | 109.3      | H(7A)-C(7)-H(7B)  | 108.0      |
| N(9)-C(8)-C(7)    | 111.63(16) | N(9)-C(8)-H(8A)   | 109.3      |
| C(7)-C(8)-H(8A)   | 109.3      | N(9)-C(8)-H(8B)   | 109.3      |
| C(7)-C(8)-H(8B)   | 109.3      | H(8A)-C(8)-H(8B)  | 108.0      |
| C(13)-N(9)-N(10)  | 112.0(2)   | C(13)-N(9)-C(8)   | 127.9(2)   |
| N(10)-N(9)-C(8)   | 119.68(18) | C(11)-N(10)-N(9)  | 103.7(2)   |
| N(10)-C(11)-C(12) | 112.2(2)   | N(10)-C(11)-H(11) | 123.9      |
| C(12)-C(11)-H(11) | 123.9      | C(13)-C(12)-C(11) | 105.2(3)   |
| C(13)-C(12)-H(12) | 127.4      | C(11)-C(12)-H(12) | 127.4      |
| N(9)-C(13)-C(12)  | 106.8(3)   | N(9)-C(13)-H(13)  | 126.6      |
| C(12)-C(13)-H(13) | 126.6      |                   |            |

**Table S3.** Hydrogen bonds for compound **5** [Å and °].

| D-H...A             | d(D-H)  | d(H...A) | d(D...A) | <(DHA) |
|---------------------|---------|----------|----------|--------|
| N(1)-H(1A)...N(4)#1 | 0.85(2) | 2.12(3)  | 2.964(2) | 169(2) |
| N(1)-H(1B)...N(3)#2 | 0.88(2) | 2.12(3)  | 2.994(2) | 172(2) |

Symmetry transformations used to generate equivalent atoms:

#1 x,y,z-1 #2 -x+1,-y,-z+2

**Table S4.** Bond lengths [Å] and angles [°] for compound 7.

|                   |            |                     |            |
|-------------------|------------|---------------------|------------|
| O(1)-N(3)         | 1.2272(18) | O(2)-N(3)           | 1.230(2)   |
| N(3)-C(4)         | 1.422(2)   | C(4)-C(8)           | 1.372(2)   |
| C(4)-C(5)         | 1.392(2)   | C(5)-N(6)           | 1.323(2)   |
| C(5)-H(5)         | 0.9300     | N(6)-N(7)           | 1.3712(18) |
| N(7)-C(8)         | 1.326(2)   | N(7)-C(9)           | 1.4584(19) |
| C(8)-H(8)         | 0.9300     | C(9)-C(10)          | 1.515(3)   |
| C(9)-H(9A)        | 0.9700     | C(9)-H(9B)          | 0.9700     |
| C(10)-N(11)       | 1.459(2)   | C(10)-H(10A)        | 0.9700     |
| C(10)-H(10B)      | 0.9700     | N(11)-C(15)         | 1.347(2)   |
| N(11)-N(12)       | 1.358(2)   | N(12)-N(13)         | 1.277(2)   |
| N(13)-N(14)       | 1.361(2)   | N(14)-C(15)         | 1.338(2)   |
| N(14)-H(14)       | 0.98(2)    | C(15)-N(16)         | 1.336(2)   |
| N(16)-N(17)       | 1.3413(19) | N(17)-O(19)         | 1.2318(18) |
| N(17)-O(18)       | 1.2372(19) | O(1S)-H(1S)         | 0.823(10)  |
| O(1S)-H(2S)       | 0.817(10)  |                     |            |
| O(1)-N(3)-O(2)    | 123.51(15) | O(1)-N(3)-C(4)      | 118.06(15) |
| O(2)-N(3)-C(4)    | 118.42(14) | C(8)-C(4)-C(5)      | 106.39(13) |
| C(8)-C(4)-N(3)    | 125.61(15) | C(5)-C(4)-N(3)      | 127.89(14) |
| N(6)-C(5)-C(4)    | 110.64(13) | N(6)-C(5)-H(5)      | 124.7      |
| C(4)-C(5)-H(5)    | 124.7      | C(5)-N(6)-N(7)      | 104.29(13) |
| C(8)-N(7)-N(6)    | 112.83(13) | C(8)-N(7)-C(9)      | 127.39(14) |
| N(6)-N(7)-C(9)    | 119.74(13) | N(7)-C(8)-C(4)      | 105.84(14) |
| N(7)-C(8)-H(8)    | 127.1      | C(4)-C(8)-H(8)      | 127.1      |
| N(7)-C(9)-C(10)   | 113.02(14) | N(7)-C(9)-H(9A)     | 109.0      |
| C(10)-C(9)-H(9A)  | 109.0      | N(7)-C(9)-H(9B)     | 109.0      |
| C(10)-C(9)-H(9B)  | 109.0      | H(9A)-C(9)-H(9B)    | 107.8      |
| N(11)-C(10)-C(9)  | 112.37(13) | N(11)-C(10)-H(10A)  | 109.1      |
| C(9)-C(10)-H(10A) | 109.1      | N(11)-C(10)-H(10B)  | 109.1      |
| C(9)-C(10)-H(10B) | 109.1      | H(10A)-C(10)-H(10B) | 107.9      |
| C(15)-N(11)-N(12) | 110.17(14) | C(15)-N(11)-C(10)   | 127.76(14) |
| N(12)-N(11)-C(10) | 122.03(13) | N(13)-N(12)-N(11)   | 107.65(13) |
| N(12)-N(13)-N(14) | 108.27(14) | C(15)-N(14)-N(13)   | 109.94(15) |
| C(15)-N(14)-H(14) | 129.8(11)  | N(13)-N(14)-H(14)   | 120.2(11)  |
| N(16)-C(15)-N(14) | 136.59(15) | N(16)-C(15)-N(11)   | 119.40(15) |
| N(14)-C(15)-N(11) | 103.95(14) | C(15)-N(16)-N(17)   | 115.53(14) |
| O(19)-N(17)-O(18) | 121.55(14) | O(19)-N(17)-N(16)   | 116.44(15) |
| O(18)-N(17)-N(16) | 122.00(14) | H(1S)-O(1S)-H(2S)   | 91.0(13)   |

**Table S5.** Hydrogen bonds for compound 7 [ $\text{\AA}$  and  $^\circ$ ].

| D-H...A                | d(D-H)    | d(H...A)  | d(D...A)   | $\angle(\text{DHA})$ |
|------------------------|-----------|-----------|------------|----------------------|
| C(9)-H(9B)...O(1)#1    | 0.97      | 2.56      | 3.108(2)   | 115.5                |
| C(10)-H(10B)...N(13)#2 | 0.97      | 2.55      | 3.519(2)   | 173.4                |
| N(14)-H(14)...O(1S)#3  | 0.98(2)   | 1.69(2)   | 2.646(2)   | 163.0(17)            |
| O(1S)-H(1S)...O(18)#4  | 0.823(10) | 2.115(10) | 2.9239(19) | 167(2)               |
| O(1S)-H(2S)...O(19)#5  | 0.817(10) | 2.165(10) | 2.977(2)   | 173(3)               |

Symmetry transformations used to generate equivalent atoms:

#1  $x, y-1, z$  #2  $x, -y+1/2, z+1/2$  #3  $-x+1, y-1/2, -z+1/2$ #4  $x+1, y+1, z+1$  #5  $-x+1, -y, -z+1$ **Table S6.** Bond lengths [ $\text{\AA}$ ] and angles [ $^\circ$ ] for compound 8.

|                   |            |                  |            |
|-------------------|------------|------------------|------------|
| N(1)-C(2)         | 1.327(2)   | N(1)-N(5)        | 1.3527(17) |
| C(2)-C(3)         | 1.377(2)   | C(2)-H(2)        | 0.9300     |
| C(3)-C(4)         | 1.355(2)   | C(3)-H(3)        | 0.9300     |
| C(4)-N(5)         | 1.343(2)   | C(4)-H(4)        | 0.9300     |
| N(5)-C(6)         | 1.441(2)   | C(6)-C(7)        | 1.508(2)   |
| C(6)-H(6A)        | 0.9700     | C(6)-H(6B)       | 0.9700     |
| C(7)-N(8)         | 1.4622(18) | C(7)-H(7A)       | 0.9700     |
| C(7)-H(7B)        | 0.9700     | N(8)-C(12)       | 1.339(2)   |
| N(8)-N(9)         | 1.3464(19) | N(9)-N(10)       | 1.302(2)   |
| N(10)-N(11)       | 1.365(2)   | N(11)-C(12)      | 1.315(2)   |
| C(12)-N(13)       | 1.395(2)   | N(13)-N(14)      | 1.2504(17) |
| N(14)-O(15)       | 1.3386(19) | O(15)-H(15)      | 0.853(9)   |
| C(2)-N(1)-N(5)    | 104.94(13) | N(1)-C(2)-C(3)   | 111.58(15) |
| N(1)-C(2)-H(2)    | 124.2      | C(3)-C(2)-H(2)   | 124.2      |
| C(4)-C(3)-C(2)    | 104.94(15) | C(4)-C(3)-H(3)   | 127.5      |
| C(2)-C(3)-H(3)    | 127.5      | N(5)-C(4)-C(3)   | 107.98(14) |
| N(5)-C(4)-H(4)    | 126.0      | C(3)-C(4)-H(4)   | 126.0      |
| C(4)-N(5)-N(1)    | 110.56(13) | C(4)-N(5)-C(6)   | 128.55(13) |
| N(1)-N(5)-C(6)    | 120.71(12) | N(5)-C(6)-C(7)   | 112.63(13) |
| N(5)-C(6)-H(6A)   | 109.1      | C(7)-C(6)-H(6A)  | 109.1      |
| N(5)-C(6)-H(6B)   | 109.1      | C(7)-C(6)-H(6B)  | 109.1      |
| H(6A)-C(6)-H(6B)  | 107.8      | N(8)-C(7)-C(6)   | 112.17(12) |
| N(8)-C(7)-H(7A)   | 109.2      | C(6)-C(7)-H(7A)  | 109.2      |
| N(8)-C(7)-H(7B)   | 109.2      | C(6)-C(7)-H(7B)  | 109.2      |
| H(7A)-C(7)-H(7B)  | 107.9      | C(12)-N(8)-N(9)  | 108.30(13) |
| C(12)-N(8)-C(7)   | 128.76(14) | N(9)-N(8)-C(7)   | 122.86(14) |
| N(10)-N(9)-N(8)   | 105.86(15) | N(9)-N(10)-N(11) | 111.43(14) |
| C(12)-N(11)-N(10) | 104.74(15) | N(11)-C(12)-N(8) | 109.66(16) |

|                   |            |                   |            |
|-------------------|------------|-------------------|------------|
| N(11)-C(12)-N(13) | 132.12(16) | N(8)-C(12)-N(13)  | 118.21(13) |
| N(14)-N(13)-C(12) | 112.69(13) | N(13)-N(14)-O(15) | 109.26(13) |
| N(14)-O(15)-H(15) | 102.3(15)  |                   |            |

**Table S7.** Hydrogen bonds for compound **8** [Å and °].

| D-H...A              | d(D-H)   | d(H...A)  | d(D...A)   | <(DHA) |
|----------------------|----------|-----------|------------|--------|
| C(2)-H(2)...N(13)#1  | 0.93     | 2.60      | 3.526(2)   | 176.6  |
| O(15)-H(15)...N(1)#2 | 0.853(9) | 1.772(10) | 2.6200(17) | 172(2) |

Symmetry transformations used to generate equivalent atoms:

#1 x,y,z+1 #2 -x+1,-y+1,-z+1

**Table S8.** Bond lengths [Å] and angles [°] for compound **9**.

|                     |          |                    |          |
|---------------------|----------|--------------------|----------|
| O(1)-N(3)           | 1.241(5) | O(2)-N(3)          | 1.243(5) |
| N(3)-N(4)           | 1.348(6) | N(4)-C(5)          | 1.344(6) |
| C(5)-N(9)           | 1.344(6) | C(5)-N(6)          | 1.346(6) |
| N(6)-N(7)           | 1.367(5) | N(7)-N(8)          | 1.279(6) |
| N(8)-N(9)           | 1.372(5) | N(9)-C(10)         | 1.463(6) |
| C(10)-C(11)         | 1.523(7) | C(10)-H(10A)       | 0.9900   |
| C(10)-H(10B)        | 0.9900   | C(11)-N(12)        | 1.462(6) |
| C(11)-H(11A)        | 0.9900   | C(11)-H(11B)       | 0.9900   |
| N(12)-N(13)         | 1.335(5) | N(12)-C(20)        | 1.357(6) |
| N(13)-C(14)         | 1.319(6) | C(14)-C(18)        | 1.399(8) |
| C(14)-N(15)         | 1.459(7) | N(15)-O(16)        | 1.211(6) |
| N(15)-O(17)         | 1.225(6) | C(18)-C(20)        | 1.384(7) |
| C(18)-Cl(19)        | 1.684(5) | C(20)-N(21)        | 1.443(7) |
| N(21)-O(23)         | 1.210(6) | N(21)-O(22)        | 1.219(6) |
| O(1S)-H(1S)         | 0.92(6)  | O(1S)-H(2S)        | 0.82(6)  |
| O(1)-N(3)-O(2)      | 122.2(4) | O(1)-N(3)-N(4)     | 121.6(4) |
| O(2)-N(3)-N(4)      | 116.2(4) | C(5)-N(4)-N(3)     | 115.7(4) |
| N(9)-C(5)-N(4)      | 119.2(4) | N(9)-C(5)-N(6)     | 105.4(4) |
| N(4)-C(5)-N(6)      | 135.4(5) | C(5)-N(6)-N(7)     | 108.4(4) |
| N(8)-N(7)-N(6)      | 109.5(4) | N(7)-N(8)-N(9)     | 107.1(4) |
| C(5)-N(9)-N(8)      | 109.6(4) | C(5)-N(9)-C(10)    | 127.8(4) |
| N(8)-N(9)-C(10)     | 121.5(4) | N(9)-C(10)-C(11)   | 110.7(4) |
| N(9)-C(10)-H(10A)   | 109.5    | C(11)-C(10)-H(10A) | 109.5    |
| N(9)-C(10)-H(10B)   | 109.5    | C(11)-C(10)-H(10B) | 109.5    |
| H(10A)-C(10)-H(10B) | 108.1    | N(12)-C(11)-C(10)  | 109.7(4) |
| N(12)-C(11)-H(11A)  | 109.7    | C(10)-C(11)-H(11A) | 109.7    |
| N(12)-C(11)-H(11B)  | 109.7    | C(10)-C(11)-H(11B) | 109.7    |



|                     |          |                    |          |
|---------------------|----------|--------------------|----------|
| H(11A)-C(11)-H(11B) | 108.2    | N(13)-N(12)-C(20)  | 110.8(4) |
| N(13)-N(12)-C(11)   | 116.0(4) | C(20)-N(12)-C(11)  | 132.3(4) |
| C(14)-N(13)-N(12)   | 105.1(4) | N(13)-C(14)-C(18)  | 113.5(4) |
| N(13)-C(14)-N(15)   | 117.8(5) | C(18)-C(14)-N(15)  | 128.7(5) |
| O(16)-N(15)-O(17)   | 125.4(5) | O(16)-N(15)-C(14)  | 117.9(5) |
| O(17)-N(15)-C(14)   | 116.7(5) | C(20)-C(18)-C(14)  | 101.9(5) |
| C(20)-C(18)-Cl(19)  | 129.0(5) | C(14)-C(18)-Cl(19) | 128.9(4) |
| N(12)-C(20)-C(18)   | 108.6(5) | N(12)-C(20)-N(21)  | 123.0(4) |
| C(18)-C(20)-N(21)   | 128.4(5) | O(23)-N(21)-O(22)  | 125.1(5) |
| O(23)-N(21)-C(20)   | 116.8(5) | O(22)-N(21)-C(20)  | 118.1(5) |
| H(1S)-O(1S)-H(2S)   | 103(5)   |                    |          |

**Table S9.** Hydrogen bonds for compound **9** [ $\text{\AA}$  and  $^\circ$ ].

| D-H...A                | d(D-H)  | d(H...A) | d(D...A) | $\angle(\text{DHA})$ |
|------------------------|---------|----------|----------|----------------------|
| C(10)-H(10B)...O(1S)#1 | 0.99    | 2.60     | 3.393(6) | 136.6                |
| C(11)-H(11B)...O(17)#2 | 0.99    | 2.47     | 3.163(6) | 126.4                |
| C(11)-H(11B)...O(22)   | 0.99    | 2.25     | 2.815(7) | 114.8                |
| O(1S)-H(1S)...O(2)#3   | 0.92(6) | 2.01(6)  | 2.891(5) | 161(5)               |
| O(1S)-H(2S)...N(4)#4   | 0.82(6) | 2.08(6)  | 2.803(5) | 147(6)               |

Symmetry transformations used to generate equivalent atoms:

#1  $x, y+2, z+1$  #2  $x, -y+3/2, z+1/2$  #3  $-x, -y-1, -z+1$

#4  $x, y-2, z-1$

**Table S10.** Bond lengths [ $\text{\AA}$ ] and angles [ $^\circ$ ] for compound **12**.

|                |            |                |            |
|----------------|------------|----------------|------------|
| N(1)-C(5)      | 1.3447(18) | N(1)-N(2)      | 1.3453(16) |
| N(2)-C(3)      | 1.3439(18) | C(3)-C(4)      | 1.3849(19) |
| C(3)-N(6)      | 1.4352(18) | C(4)-C(5)      | 1.3832(19) |
| C(4)-N(9)      | 1.4536(17) | C(5)-N(12)     | 1.4409(17) |
| N(6)-O(7)      | 1.2252(17) | N(6)-O(8)      | 1.2353(17) |
| N(9)-O(10)     | 1.2131(17) | N(9)-O(11)     | 1.2165(18) |
| N(12)-O(14)    | 1.2261(16) | N(12)-O(13)    | 1.2268(16) |
| N(1S)-C(2S)    | 1.492(2)   | N(1S)-H(1S)    | 0.884(19)  |
| N(1S)-H(2S)    | 0.86(2)    | N(1S)-H(3S)    | 0.899(19)  |
| C(2S)-C(3S)    | 1.503(2)   | C(2S)-H(5S)    | 0.9900     |
| C(2S)-H(4S)    | 0.9900     | C(3S)-Br(4S)   | 1.9495(15) |
| C(3S)-H(7S)    | 0.9900     | C(3S)-H(6S)    | 0.9900     |
| C(5)-N(1)-N(2) | 107.73(11) | C(3)-N(2)-N(1) | 107.09(11) |
| N(2)-C(3)-C(4) | 111.83(12) | N(2)-C(3)-N(6) | 120.19(12) |

|                    |            |                   |            |
|--------------------|------------|-------------------|------------|
| C(4)-C(3)-N(6)     | 127.91(12) | C(5)-C(4)-C(3)    | 101.91(12) |
| C(5)-C(4)-N(9)     | 128.67(12) | C(3)-C(4)-N(9)    | 129.38(12) |
| N(1)-C(5)-C(4)     | 111.45(12) | N(1)-C(5)-N(12)   | 121.35(12) |
| C(4)-C(5)-N(12)    | 127.21(12) | O(7)-N(6)-O(8)    | 124.27(12) |
| O(7)-N(6)-C(3)     | 118.52(12) | O(8)-N(6)-C(3)    | 117.19(12) |
| O(10)-N(9)-O(11)   | 124.88(13) | O(10)-N(9)-C(4)   | 118.15(12) |
| O(11)-N(9)-C(4)    | 116.97(12) | O(14)-N(12)-O(13) | 125.28(12) |
| O(14)-N(12)-C(5)   | 118.40(12) | O(13)-N(12)-C(5)  | 116.32(12) |
| C(2S)-N(1S)-H(1S)  | 109.5(12)  | C(2S)-N(1S)-H(2S) | 110.7(12)  |
| H(1S)-N(1S)-H(2S)  | 108.6(17)  | C(2S)-N(1S)-H(3S) | 109.7(12)  |
| H(1S)-N(1S)-H(3S)  | 107.2(17)  | H(2S)-N(1S)-H(3S) | 111.2(17)  |
| N(1S)-C(2S)-C(3S)  | 112.81(12) | N(1S)-C(2S)-H(5S) | 109.0      |
| C(3S)-C(2S)-H(5S)  | 109.0      | N(1S)-C(2S)-H(4S) | 109.0      |
| C(3S)-C(2S)-H(4S)  | 109.0      | H(5S)-C(2S)-H(4S) | 107.8      |
| C(2S)-C(3S)-Br(4S) | 111.31(11) | C(2S)-C(3S)-H(7S) | 109.4      |
| Br(4S)-C(3S)-H(7S) | 109.4      | C(2S)-C(3S)-H(6S) | 109.4      |
| Br(4S)-C(3S)-H(6S) | 109.4      | H(7S)-C(3S)-H(6S) | 108.0      |

**Table S11.** Hydrogen bonds for compound **12** [Å and °].

| D-H...A               | d(D-H)    | d(H...A)  | d(D...A)   | <(DHA)    |
|-----------------------|-----------|-----------|------------|-----------|
| N(1S)-H(1S)...N(1)#1  | 0.884(19) | 2.06(2)   | 2.9110(17) | 162.4(18) |
| N(1S)-H(2S)...O(8)#2  | 0.86(2)   | 2.47(2)   | 3.2644(18) | 152.4(16) |
| N(1S)-H(3S)...N(2)#3  | 0.899(19) | 2.117(19) | 2.9637(17) | 156.8(16) |
| C(2S)-H(4S)...O(13)#4 | 0.99      | 2.55      | 3.3265(19) | 135.2     |
| C(3S)-H(6S)...O(10)#5 | 0.99      | 2.52      | 3.267(2)   | 132.5     |

Symmetry transformations used to generate equivalent atoms:

#1 -x+1,-y+1,-z #2 -x+1,-y+2,-z #3 x-1,-y+3/2,z+1/2

#4 -x+1,y+1/2,-z+1/2 #5 x,-y+3/2,z+1/2

**Table S12.** Bond lengths [Å] and angles [°] for compound **13**.

|               |          |               |          |
|---------------|----------|---------------|----------|
| N(1A)-C(2A)   | 1.334(5) | N(1A)-H(1A)   | 0.92(4)  |
| N(1A)-H(2A)   | 0.83(5)  | C(2A)-N(3A)   | 1.335(4) |
| C(2A)-N(6A)   | 1.342(5) | N(3A)-N(4A)   | 1.366(4) |
| N(4A)-N(5A)   | 1.288(4) | N(5A)-N(6A)   | 1.369(4) |
| N(6A)-C(7A)   | 1.463(4) | C(7A)-C(8A)   | 1.508(5) |
| C(7A)-H(7A1)  | 0.9900   | C(7A)-H(7A2)  | 0.9900   |
| C(8A)-N(9A)   | 1.467(4) | C(8A)-H(8A1)  | 0.9900   |
| C(8A)-H(8A2)  | 0.9900   | N(9A)-N(10A)  | 1.320(4) |
| N(9A)-C(17A)  | 1.382(5) | N(10A)-C(11A) | 1.337(4) |
| C(11A)-C(15A) | 1.407(5) | C(11A)-N(12A) | 1.419(5) |
| N(12A)-O(14A) | 1.229(4) | N(12A)-O(13A) | 1.244(4) |

|                     |          |                     |          |
|---------------------|----------|---------------------|----------|
| C(15A)-N(16A)       | 1.349(5) | C(15A)-C(17A)       | 1.397(5) |
| N(16A)-H(16A)       | 0.92(2)  | N(16A)-H(17A)       | 0.92(2)  |
| C(17A)-N(18A)       | 1.392(5) | N(18A)-O(20A)       | 1.235(4) |
| N(18A)-O(19A)       | 1.243(4) | N(1B)-C(2B)         | 1.341(4) |
| N(1B)-H(1B)         | 0.91(4)  | N(1B)-H(2B)         | 0.88(4)  |
| C(2B)-N(3B)         | 1.328(4) | C(2B)-N(6B)         | 1.352(4) |
| N(3B)-N(4B)         | 1.361(4) | N(4B)-N(5B)         | 1.285(4) |
| N(5B)-N(6B)         | 1.365(4) | N(6B)-C(7B)         | 1.454(4) |
| C(7B)-C(8B)         | 1.525(5) | C(7B)-H(7B1)        | 0.9900   |
| C(7B)-H(7B2)        | 0.9900   | C(8B)-N(9B)         | 1.473(4) |
| C(8B)-H(8B1)        | 0.9900   | C(8B)-H(8B2)        | 0.9900   |
| N(9B)-N(10B)        | 1.327(4) | N(9B)-C(17B)        | 1.385(4) |
| N(10B)-C(11B)       | 1.333(5) | C(11B)-C(15B)       | 1.399(5) |
| C(11B)-N(12B)       | 1.428(5) | N(12B)-O(13B)       | 1.226(4) |
| N(12B)-O(14B)       | 1.239(4) | C(15B)-N(16B)       | 1.347(5) |
| C(15B)-C(17B)       | 1.396(5) | N(16B)-H(16B)       | 0.92(2)  |
| N(16B)-H(17B)       | 0.92(2)  | C(17B)-N(18B)       | 1.401(5) |
| N(18B)-O(20B)       | 1.230(4) | N(18B)-O(19B)       | 1.239(4) |
|                     |          |                     |          |
| C(2A)-N(1A)-H(1A)   | 118(3)   | C(2A)-N(1A)-H(2A)   | 121(3)   |
| H(1A)-N(1A)-H(2A)   | 119(4)   | N(1A)-C(2A)-N(3A)   | 126.1(3) |
| N(1A)-C(2A)-N(6A)   | 125.3(3) | N(3A)-C(2A)-N(6A)   | 108.6(3) |
| C(2A)-N(3A)-N(4A)   | 104.9(3) | N(5A)-N(4A)-N(3A)   | 112.3(3) |
| N(4A)-N(5A)-N(6A)   | 105.5(3) | C(2A)-N(6A)-N(5A)   | 108.6(3) |
| C(2A)-N(6A)-C(7A)   | 130.6(3) | N(5A)-N(6A)-C(7A)   | 120.8(3) |
| N(6A)-C(7A)-C(8A)   | 113.8(3) | N(6A)-C(7A)-H(7A1)  | 108.8    |
| C(8A)-C(7A)-H(7A1)  | 108.8    | N(6A)-C(7A)-H(7A2)  | 108.8    |
| C(8A)-C(7A)-H(7A2)  | 108.8    | H(7A1)-C(7A)-H(7A2) | 107.7    |
| N(9A)-C(8A)-C(7A)   | 111.8(3) | N(9A)-C(8A)-H(8A1)  | 109.3    |
| C(7A)-C(8A)-H(8A1)  | 109.3    | N(9A)-C(8A)-H(8A2)  | 109.3    |
| C(7A)-C(8A)-H(8A2)  | 109.3    | H(8A1)-C(8A)-H(8A2) | 107.9    |
| N(10A)-N(9A)-C(17A) | 111.2(3) | N(10A)-N(9A)-C(8A)  | 117.5(3) |

**Table S13.** Hydrogen bonds for compound **13** [ $\text{\AA}$  and  $^\circ$ ].

| D-H...A                         | d(D-H) | d(H...A) | d(D...A) | $\angle(\text{DHA})$ |
|---------------------------------|--------|----------|----------|----------------------|
| C(8A)-H(8A1)...O(19A)#10.99     |        | 2.58     | 3.417(4) | 142.4                |
| C(8A)-H(8A2)...O(20A) 0.99      |        | 2.31     | 2.877(5) | 115.1                |
| C(8B)-H(8B1)...O(20B) 0.99      |        | 2.33     | 2.895(4) | 115.6                |
| C(8B)-H(8B2)...O(19B)#2 0.99    |        | 2.52     | 3.184(5) | 123.9                |
| N(16A)-H(16A)...O(13A)0.92(2)   |        | 2.32(4)  | 2.859(4) | 117(3)               |
| N(16A)-H(16A)...O(14B)#30.92(2) |        | 2.24(2)  | 3.150(4) | 170(3)               |
| N(1B)-H(1B)...N(3A) 0.91(4)     |        | 2.07(4)  | 2.966(5) | 168(3)               |
| N(1A)-H(1A)...N(3B) 0.92(4)     |        | 2.07(5)  | 2.976(5) | 167(4)               |

|                                 |         |          |        |
|---------------------------------|---------|----------|--------|
| N(16A)-H(17A)...O(14A)#20.92(2) | 2.38(4) | 2.957(4) | 120(4) |
| N(16A)-H(17A)...O(19A)0.92(2)   | 2.16(4) | 2.810(4) | 127(4) |
| N(16B)-H(16B)...O(13B)#10.92(2) | 2.56(3) | 3.077(4) | 117(3) |
| N(16B)-H(16B)...O(19B)0.92(2)   | 2.19(3) | 2.785(5) | 122(3) |
| N(16B)-H(17B)...O(13A)#40.92(2) | 2.41(3) | 3.274(5) | 157(5) |
| N(16B)-H(17B)...O(14B)0.92(2)   | 2.26(6) | 2.841(5) | 121(5) |

---

Symmetry transformations used to generate equivalent atoms:

#1  $x+1,y,z$  #2  $x-1,y,z$  #3  $x,y+1,z-1$  #4  $x,y-1,z+1$

## 4. NMR spectra

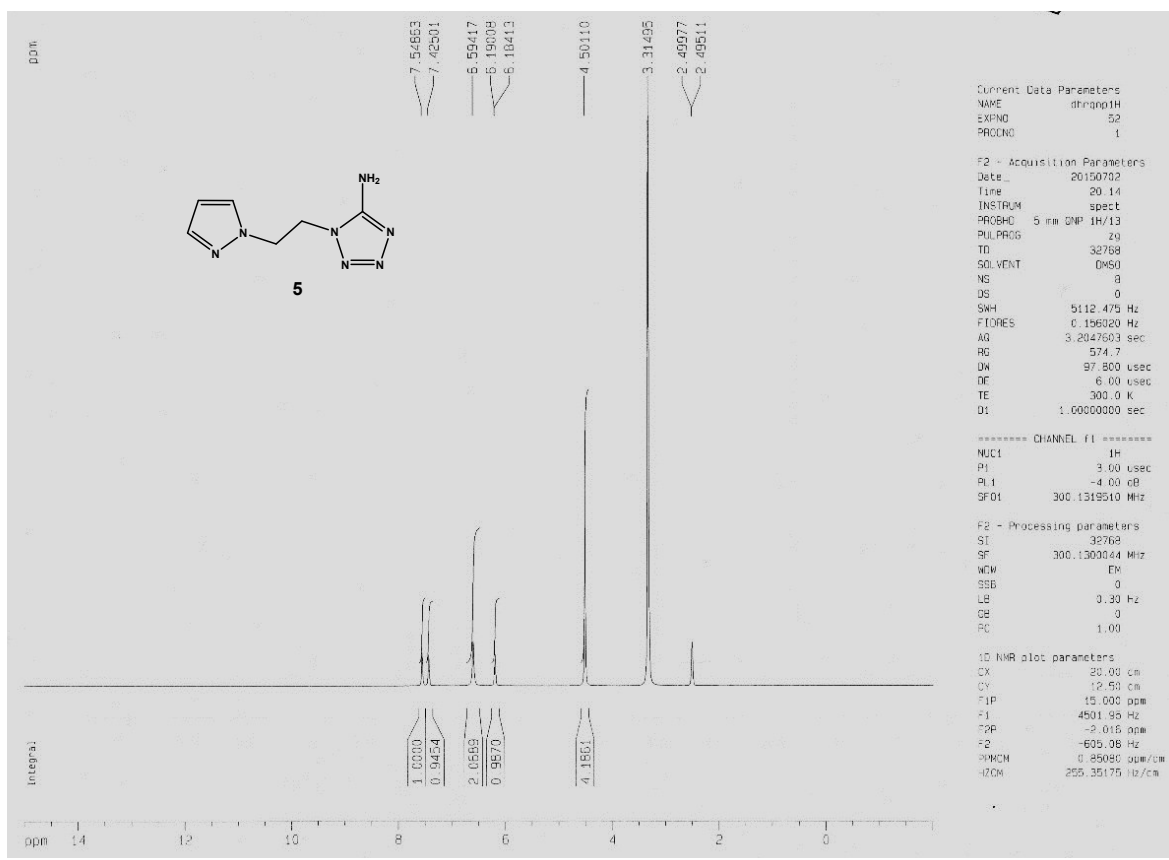

Fig S4: <sup>1</sup>H NMR Spectrum of compound 5

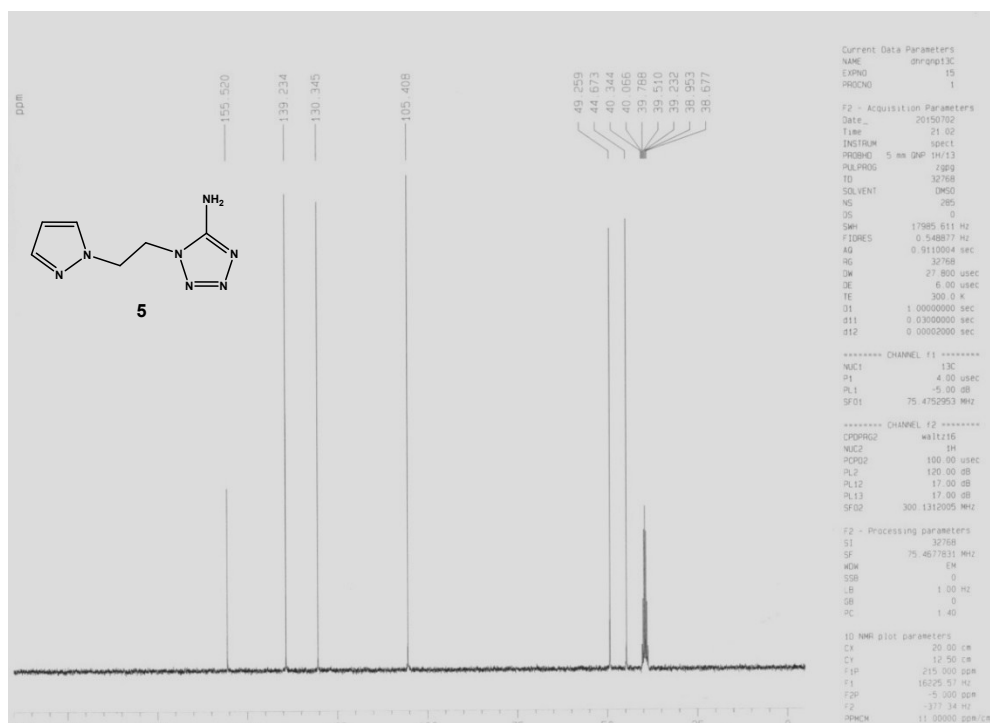

Fig S5:  $^{13}\text{C}\{^1\text{H}\}$  NMR Spectrum of compound **5**

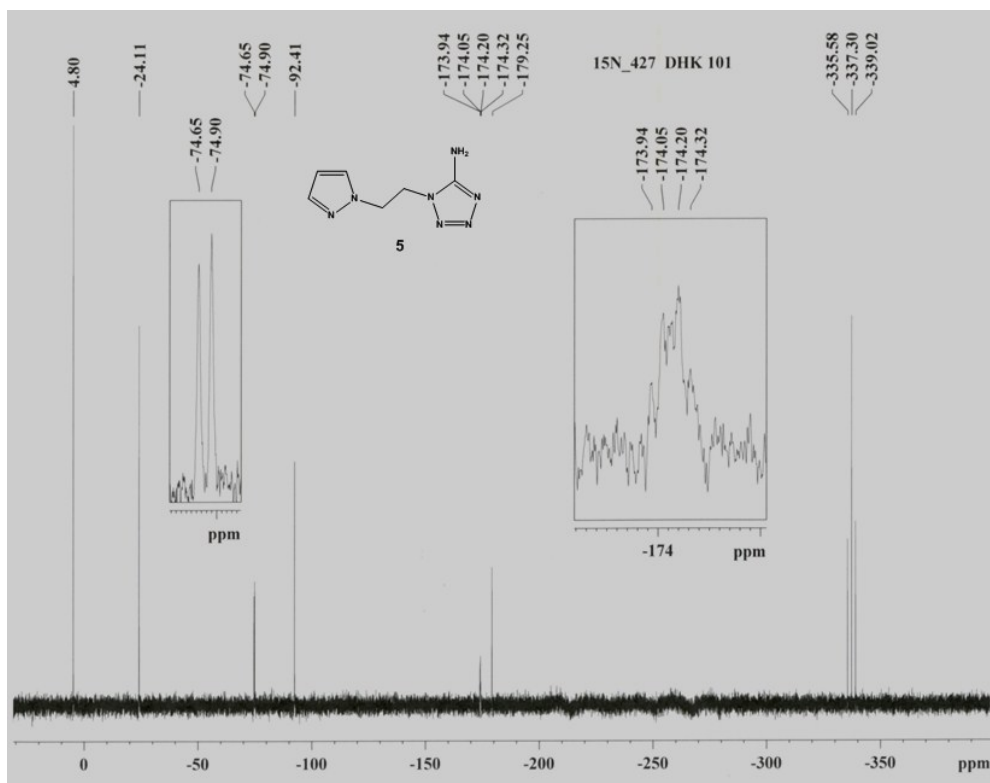

Fig S6:  $^{15}\text{N}$  NMR Spectrum of compound **5**

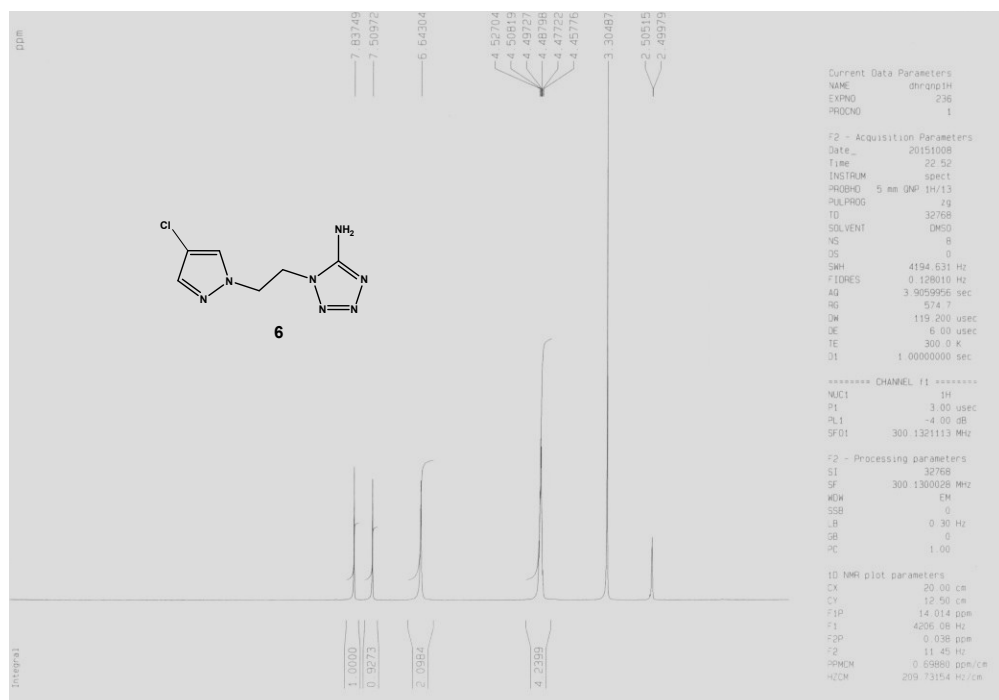

Fig S7:  $^1\text{H}$  NMR Spectrum of compound **6**

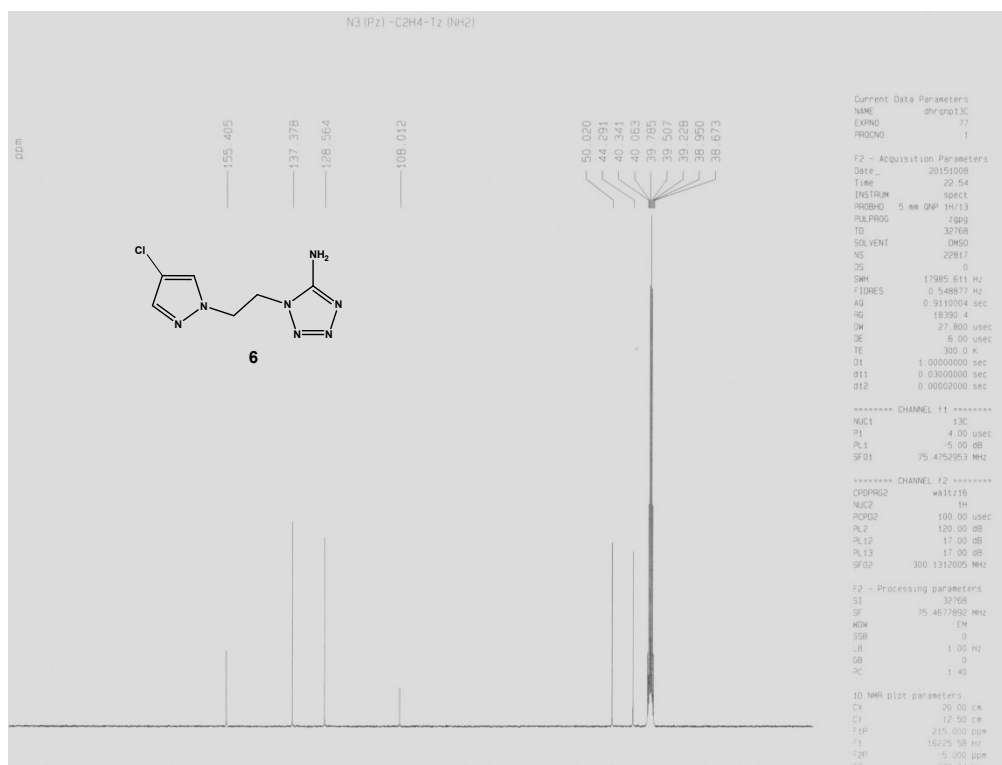

Fig S8:  $^{13}\text{C}\{^1\text{H}\}$  NMR Spectrum of compound **6**

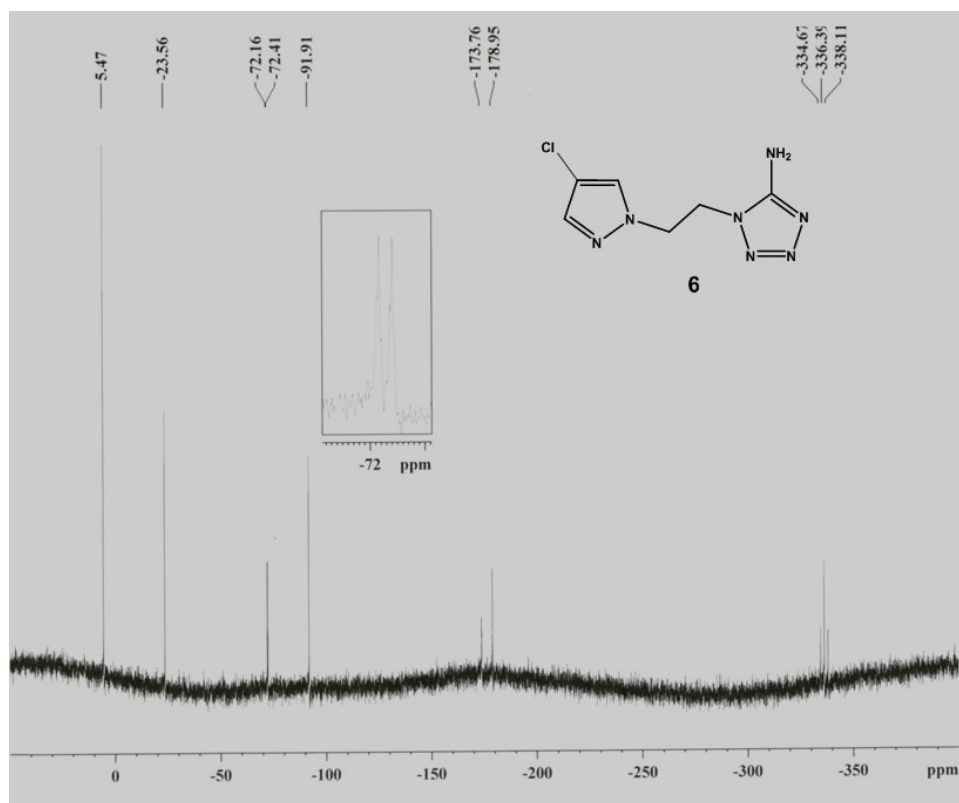

Fig S9:  $^{15}\text{N}$  NMR Spectrum of compound 6

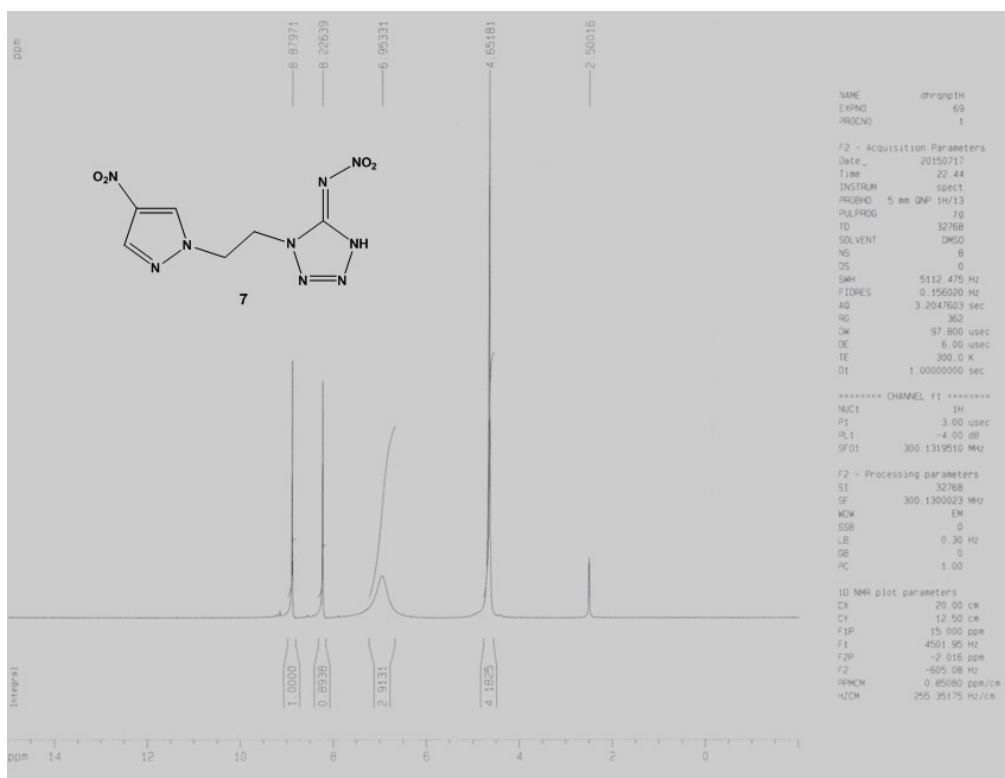

Fig S10:  $^1\text{H}$  NMR Spectrum of compound 7



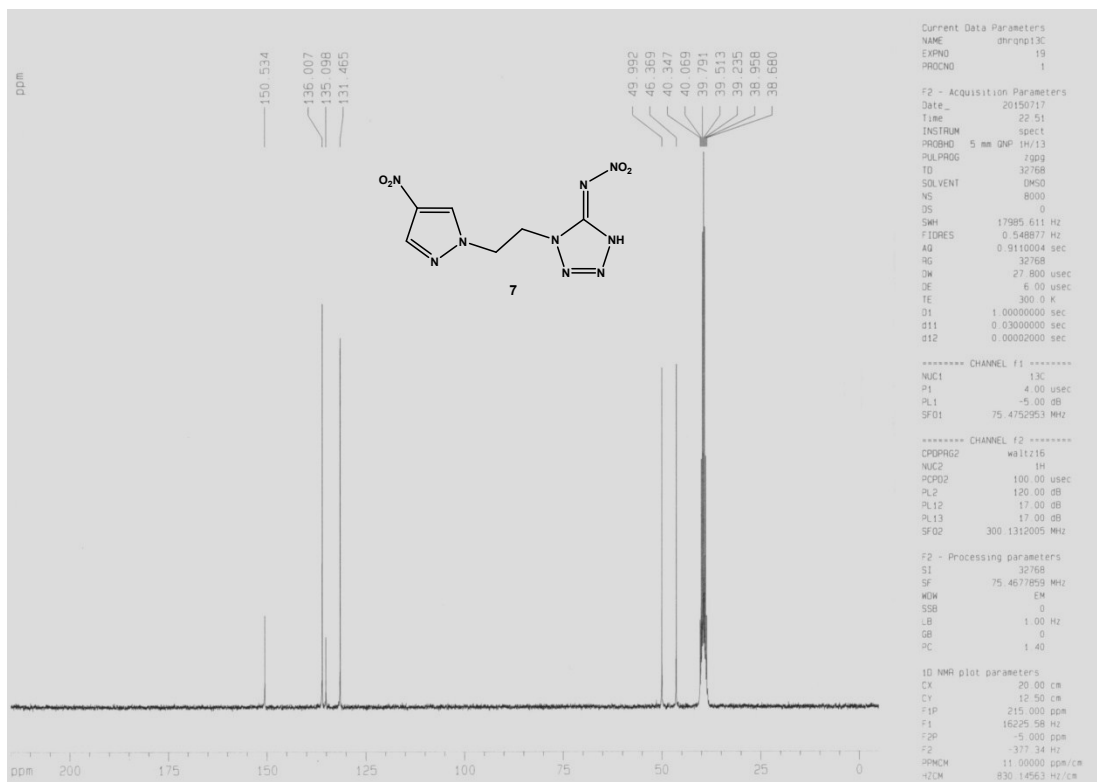

Fig S11:  $^{13}\text{C}\{^1\text{H}\}$  NMR Spectrum of compound 7

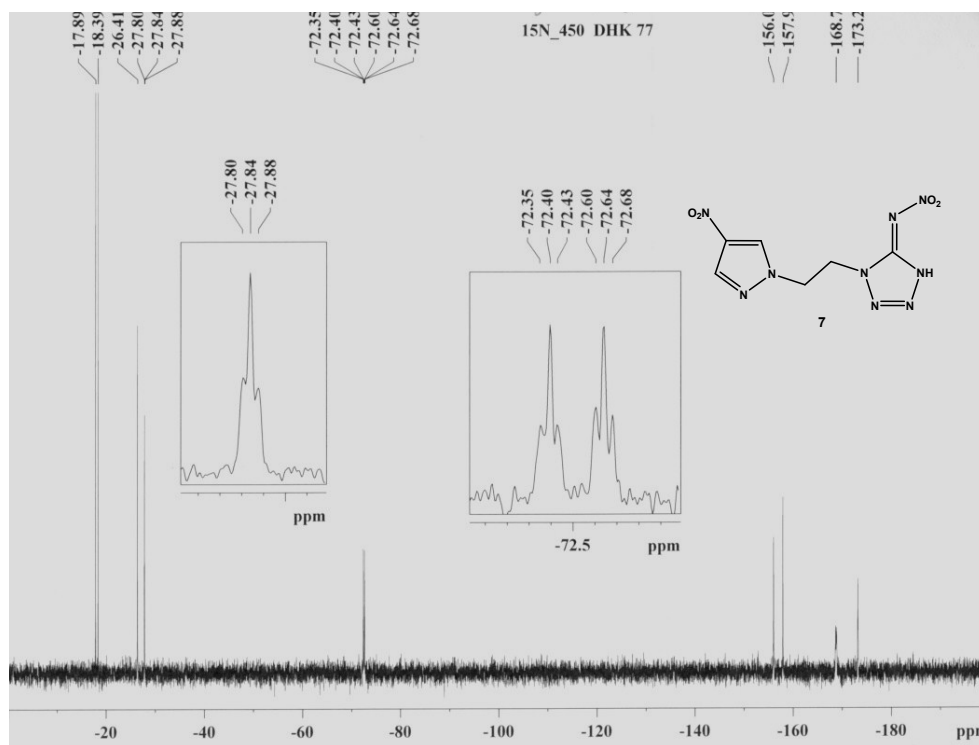

Fig S12:  $^{15}\text{N}$  NMR Spectrum of compound 7

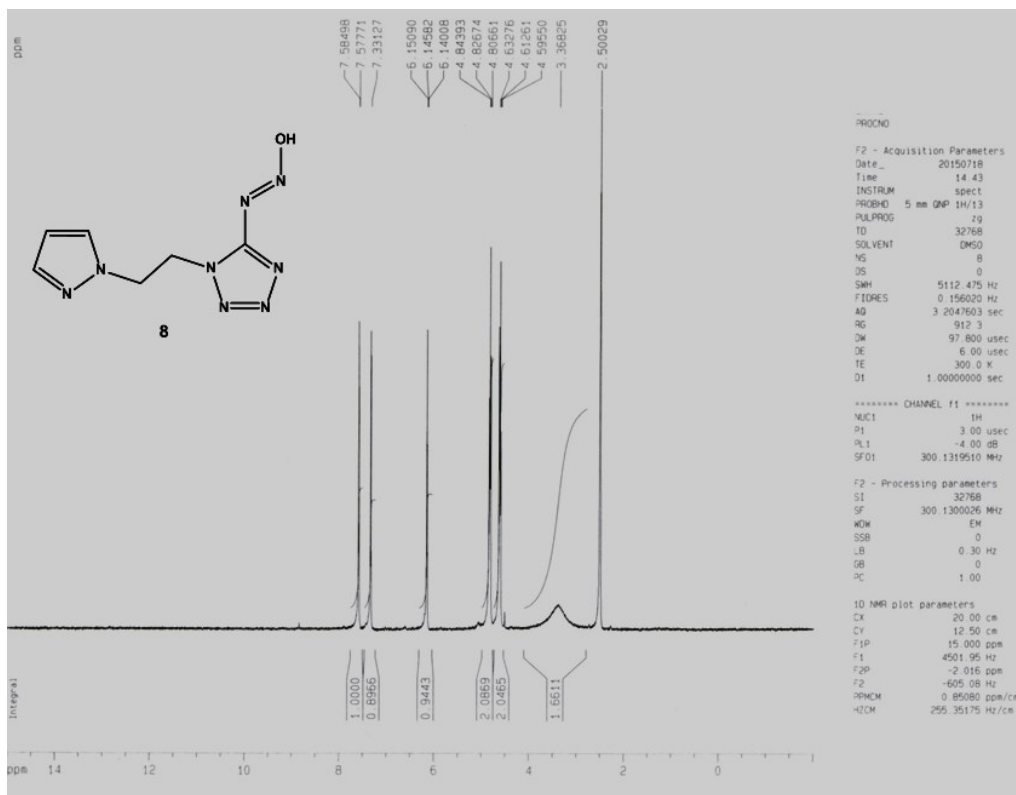

Fig S13:  $^1\text{H}$  NMR Spectrum of compound **8**

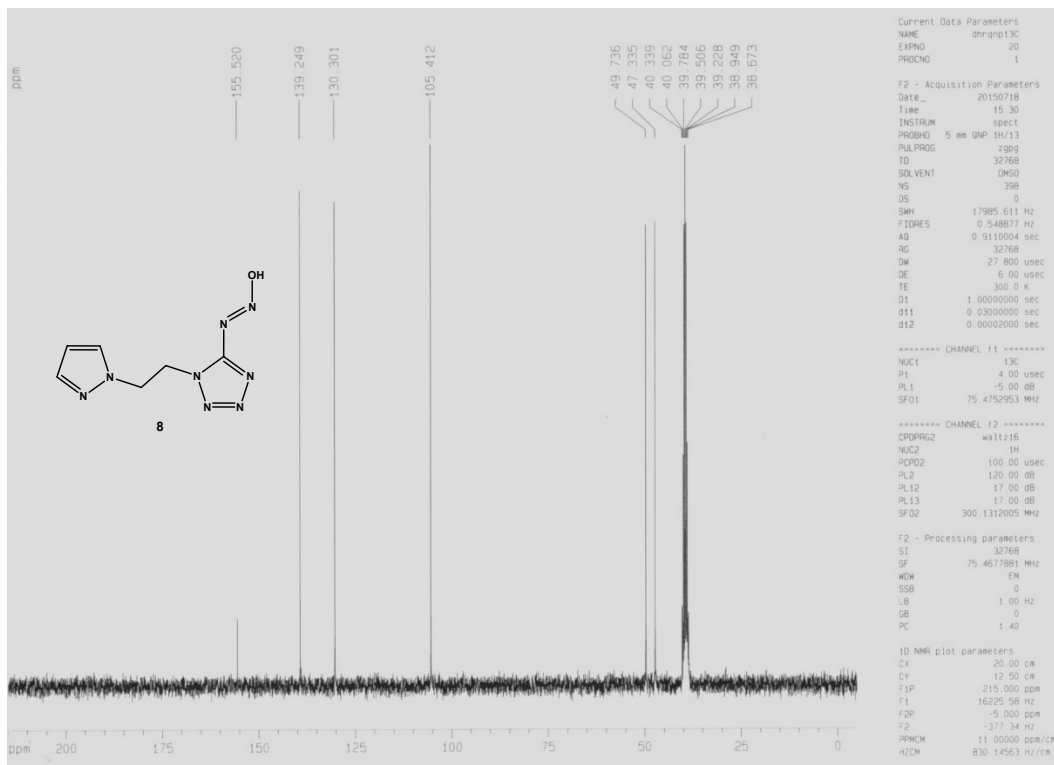

Fig S14:  $^{13}\text{C}\{^1\text{H}\}$  NMR Spectrum of compound **8**

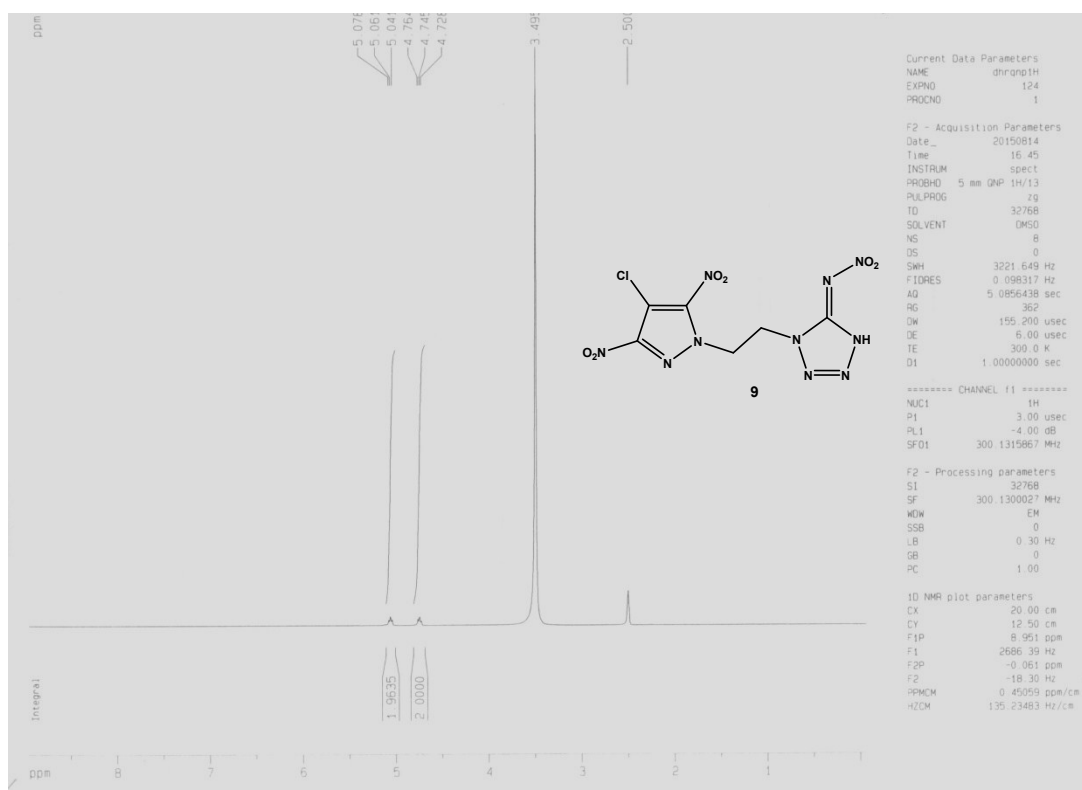

Fig S15:  $^1\text{H}$  NMR Spectrum of compound **9**

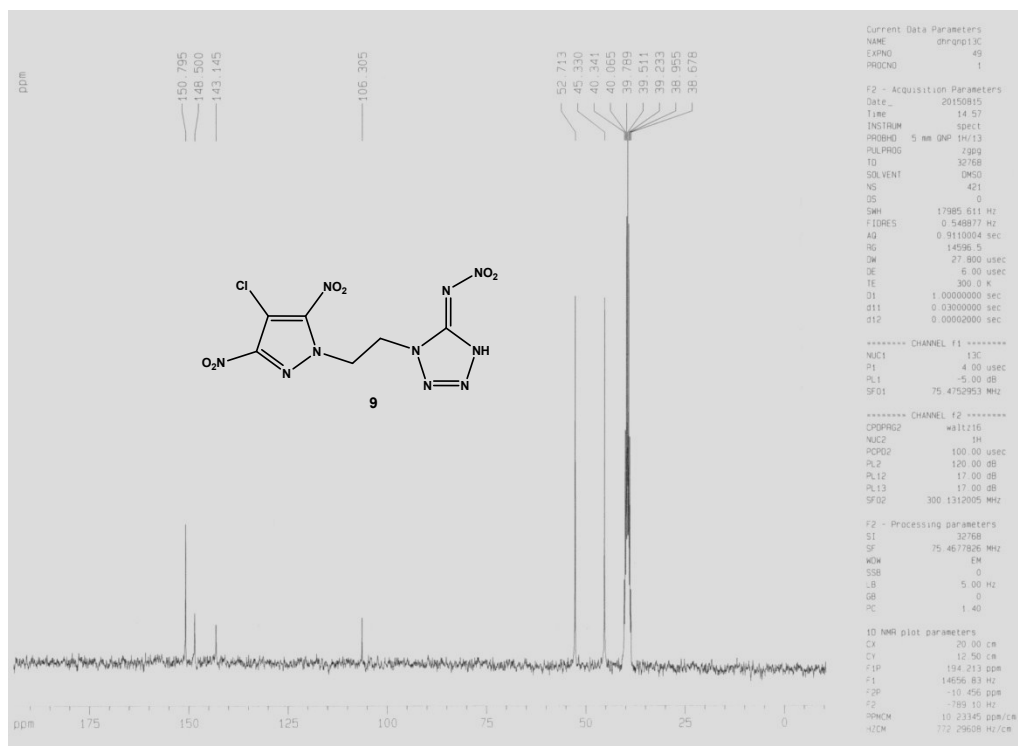

Fig S16:  $^{13}\text{C}\{^1\text{H}\}$  NMR Spectrum of compound **9**

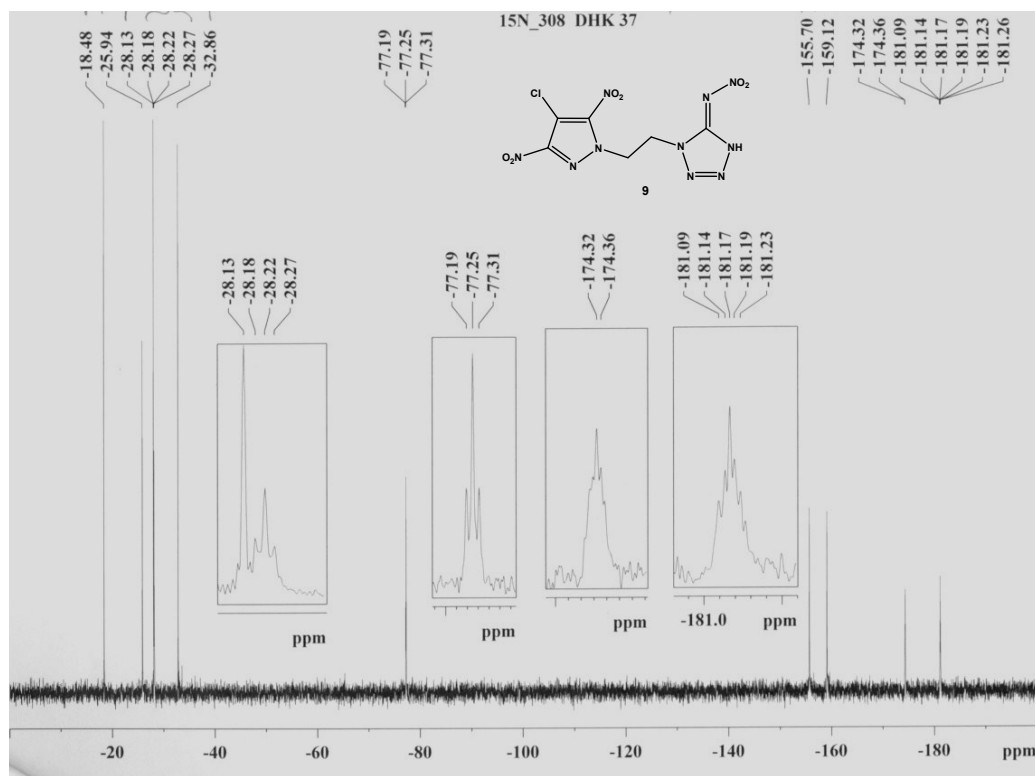

Fig S17: <sup>15</sup>N NMR Spectrum of compound 9

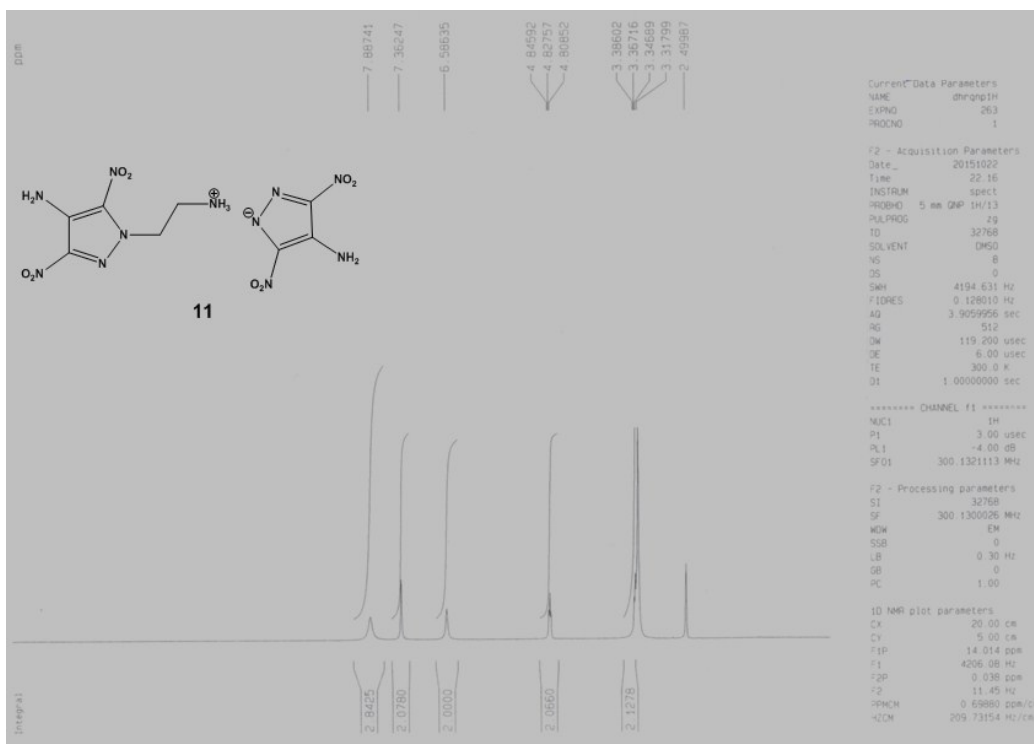

Fig S18: <sup>1</sup>H NMR Spectrum of compound 11

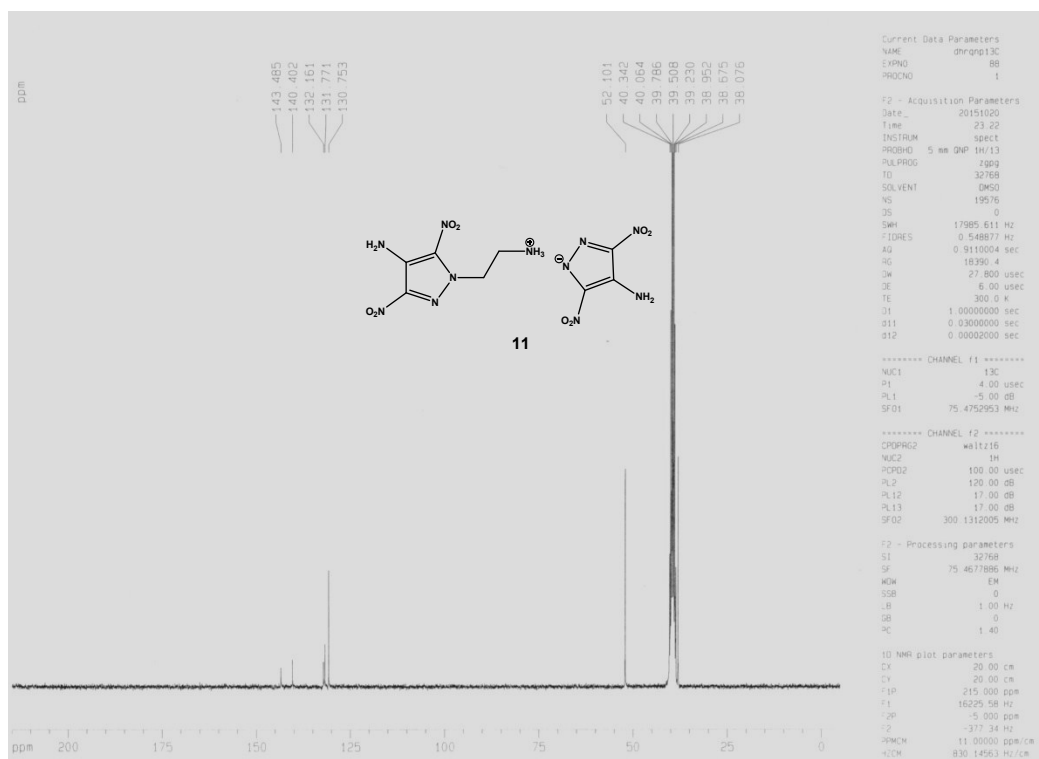

Fig S19:  $^{13}\text{C}\{^1\text{H}\}$  NMR Spectrum of compound **11**

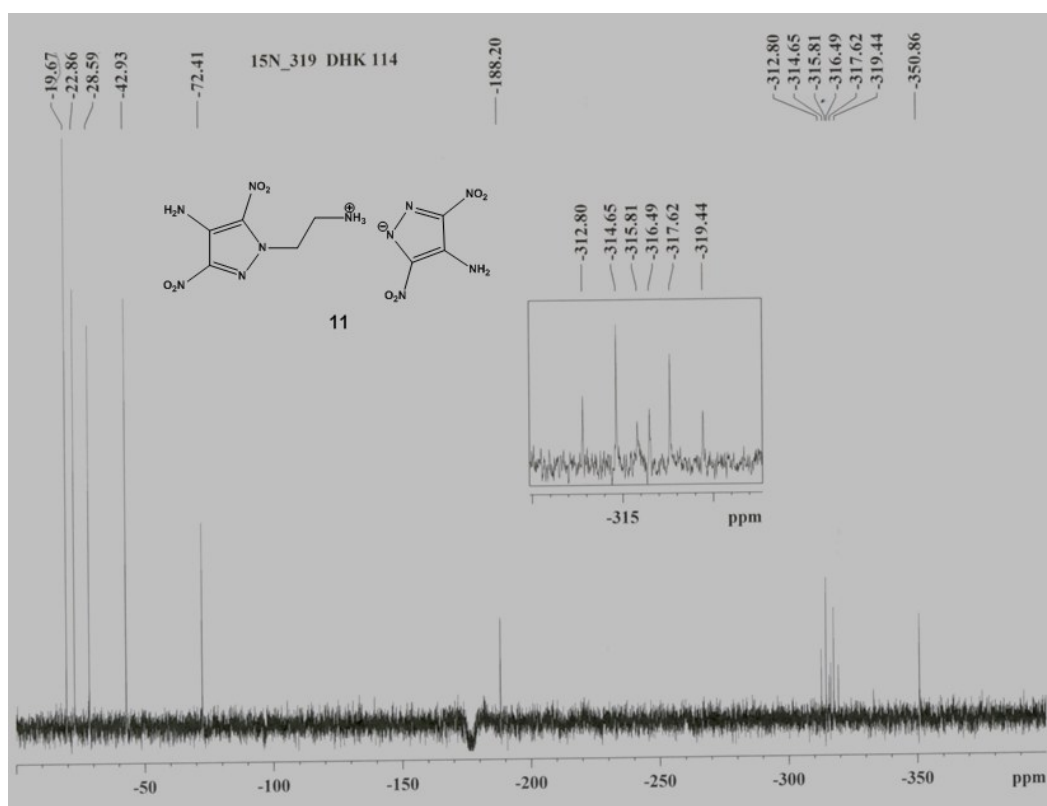

Fig S20:  $^{15}\text{N}$  NMR Spectrum of compound **11**

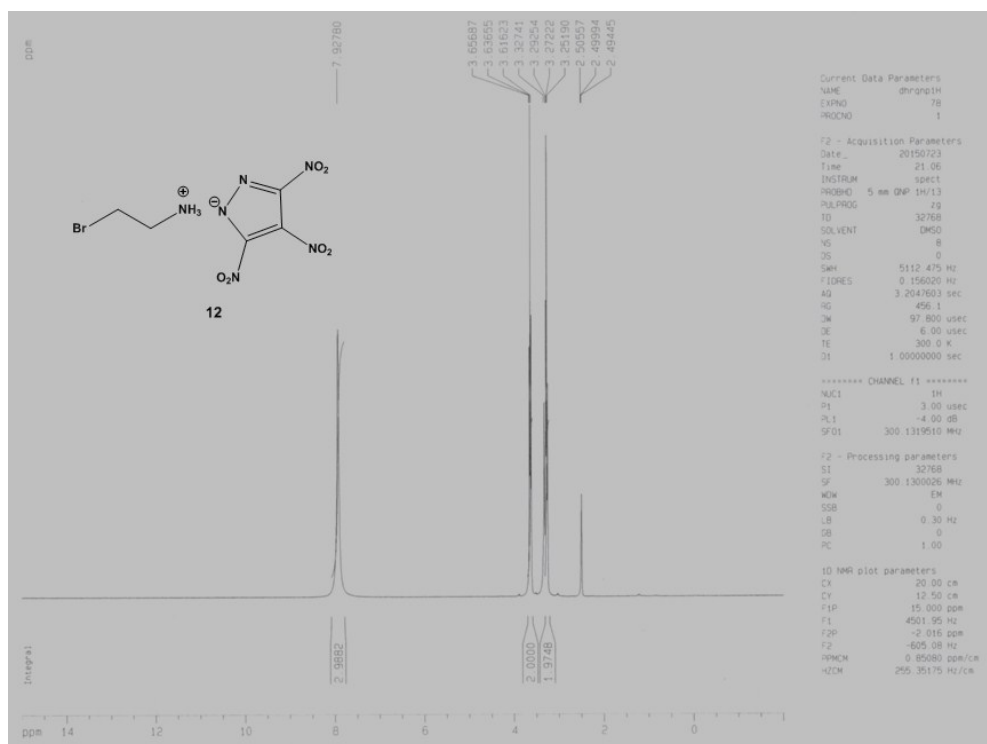

Fig S21:  $^1\text{H}$  NMR Spectrum of compound **12**

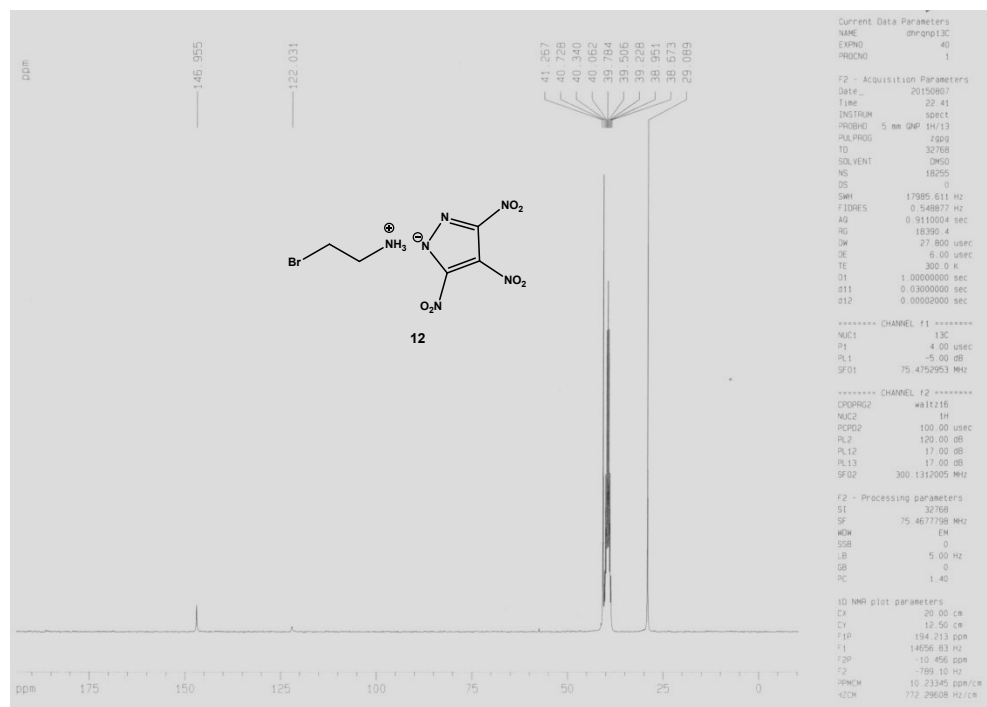

Fig S22:  $^{13}\text{C}\{^1\text{H}\}$  NMR Spectrum of compound **12**

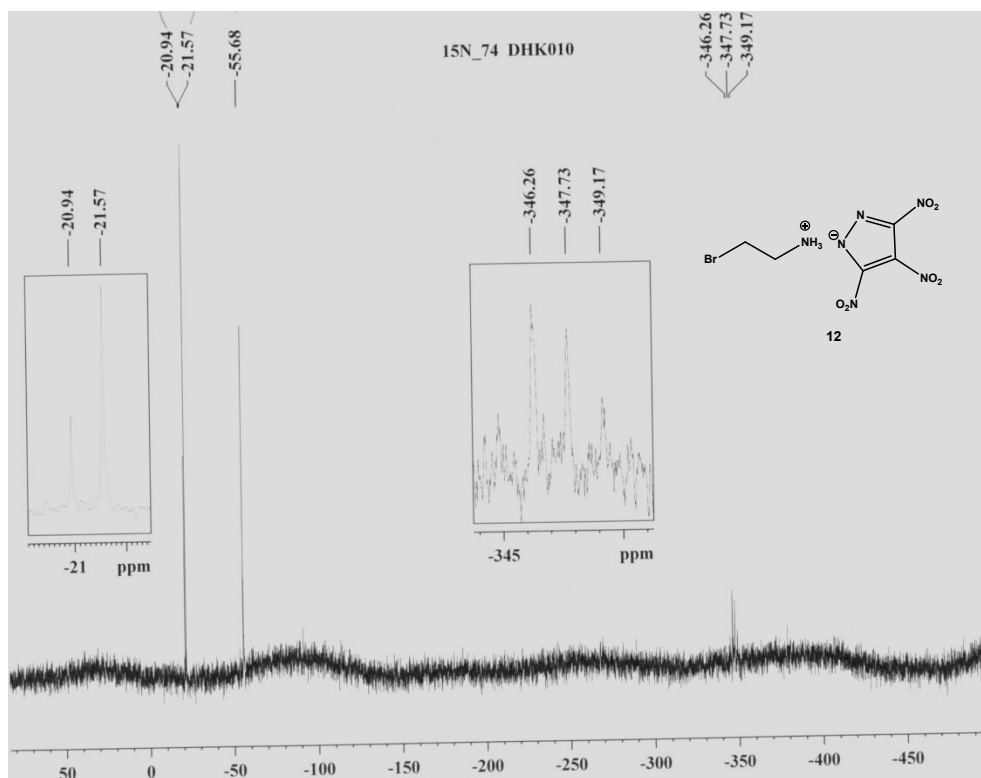

Fig S23:  $^{15}\text{N}$  NMR Spectrum of compound 12

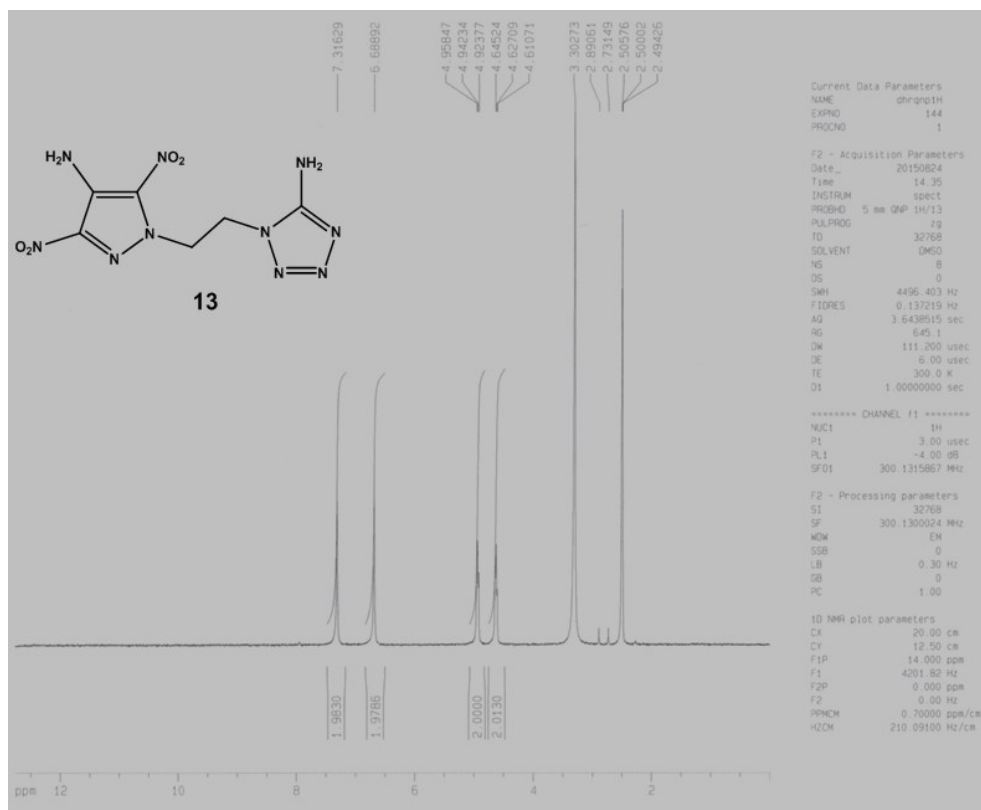

Fig S24:  $^1\text{H}$  NMR Spectrum of compound 13

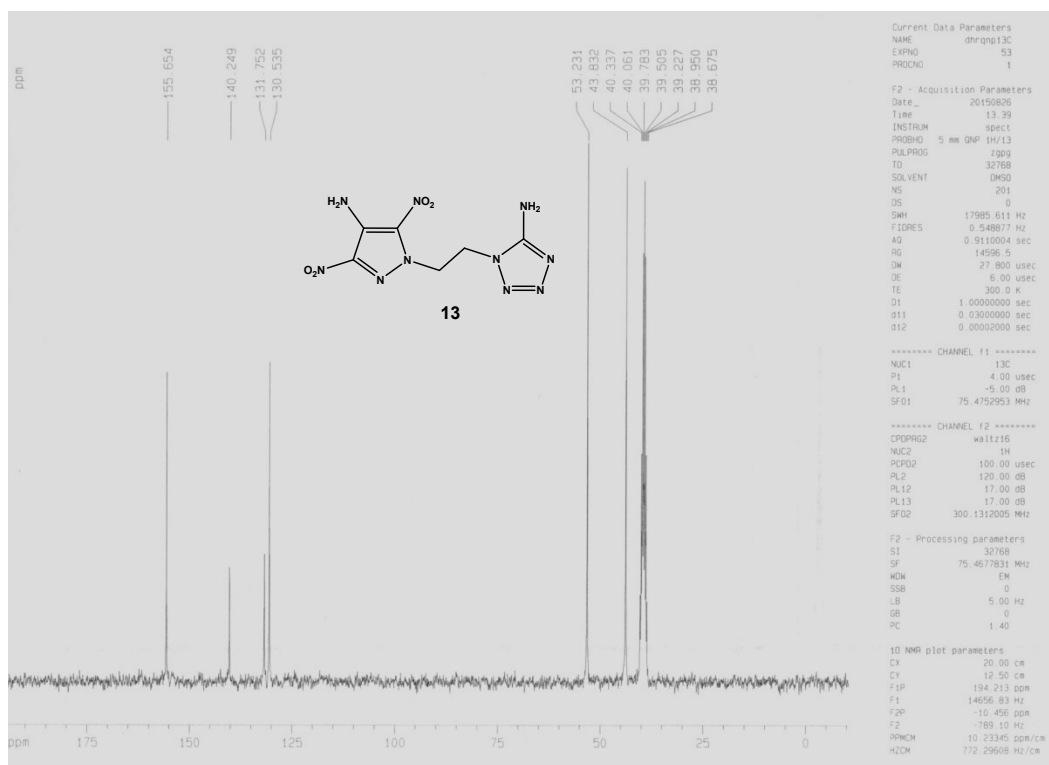

Fig S25:  $^{13}\text{C}\{^1\text{H}\}$  NMR Spectrum of compound **13**

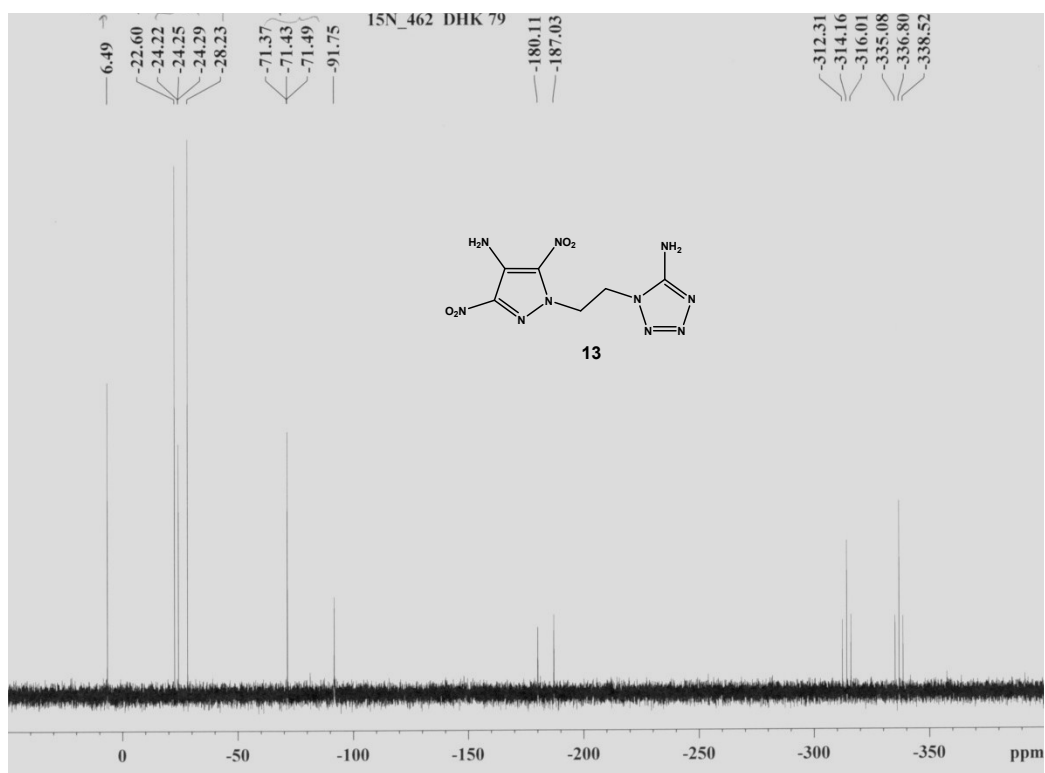

Fig S26:  $^{15}\text{N}$  NMR Spectrum of compound **13**



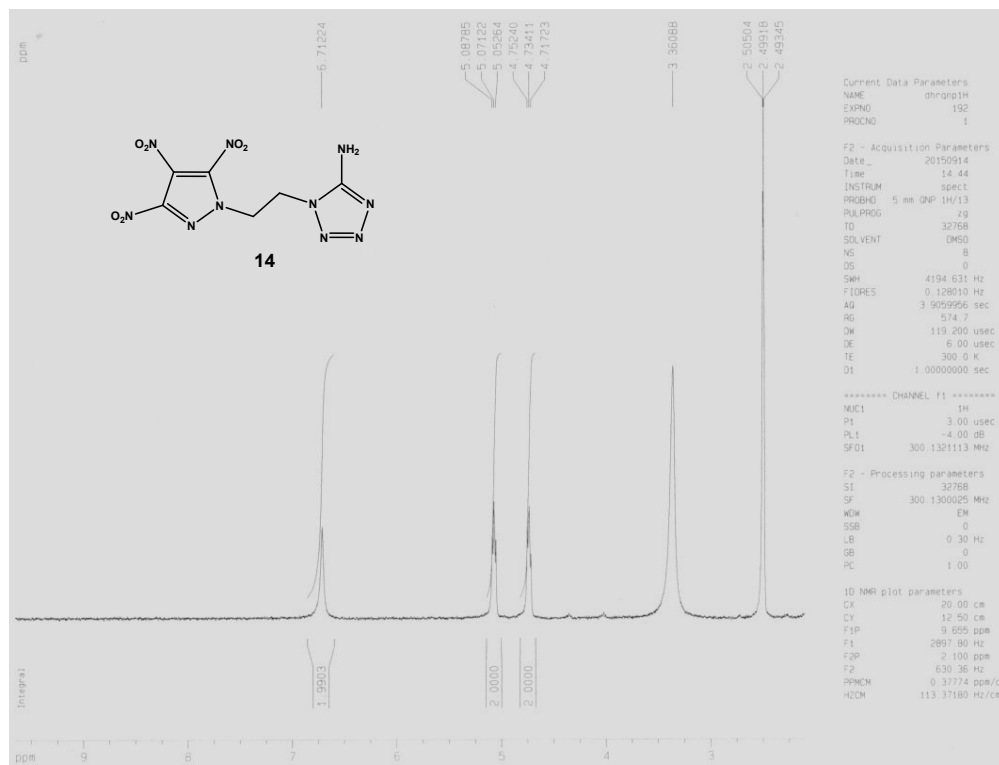

Fig S27:  $^1\text{H}$  NMR Spectrum of compound **14**

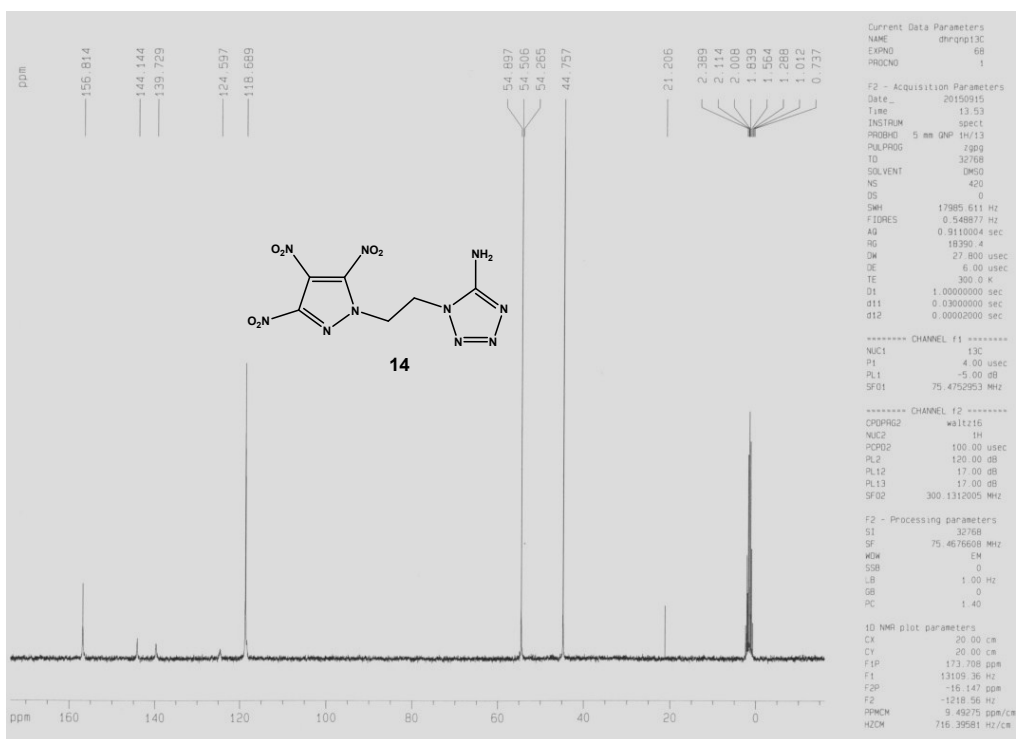

Fig S28:  $^{13}\text{C}\{^1\text{H}\}$  NMR Spectrum of compound **14**

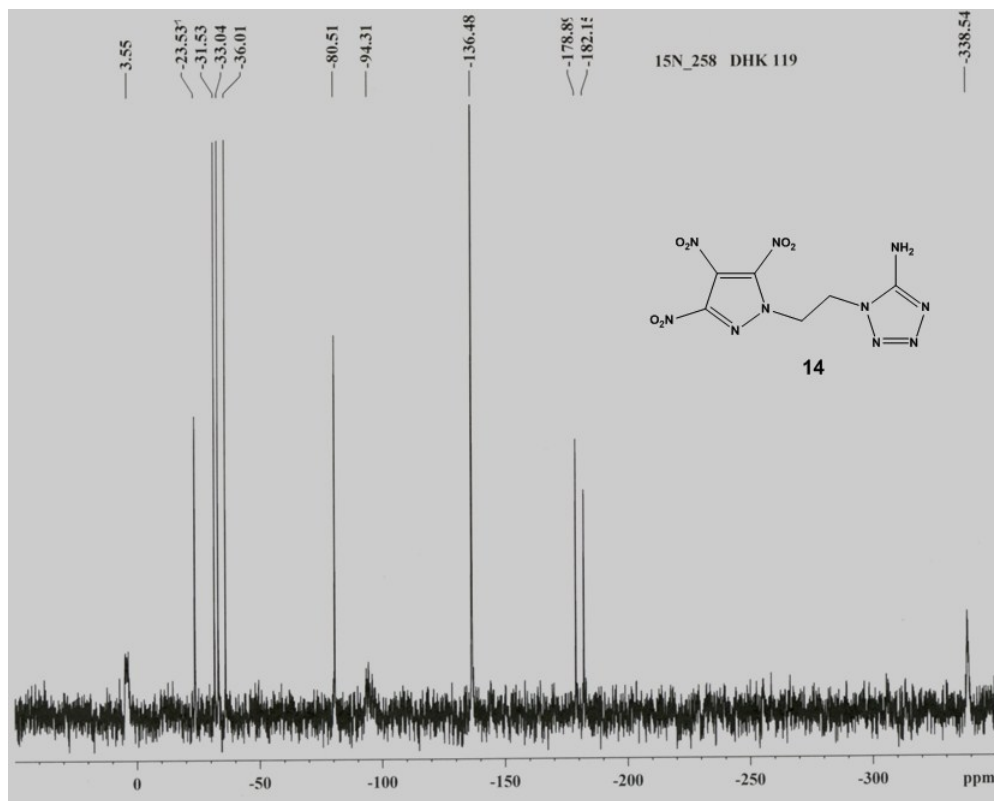

Fig S29:  $^{15}\text{N}$  NMR Spectrum of compound 14

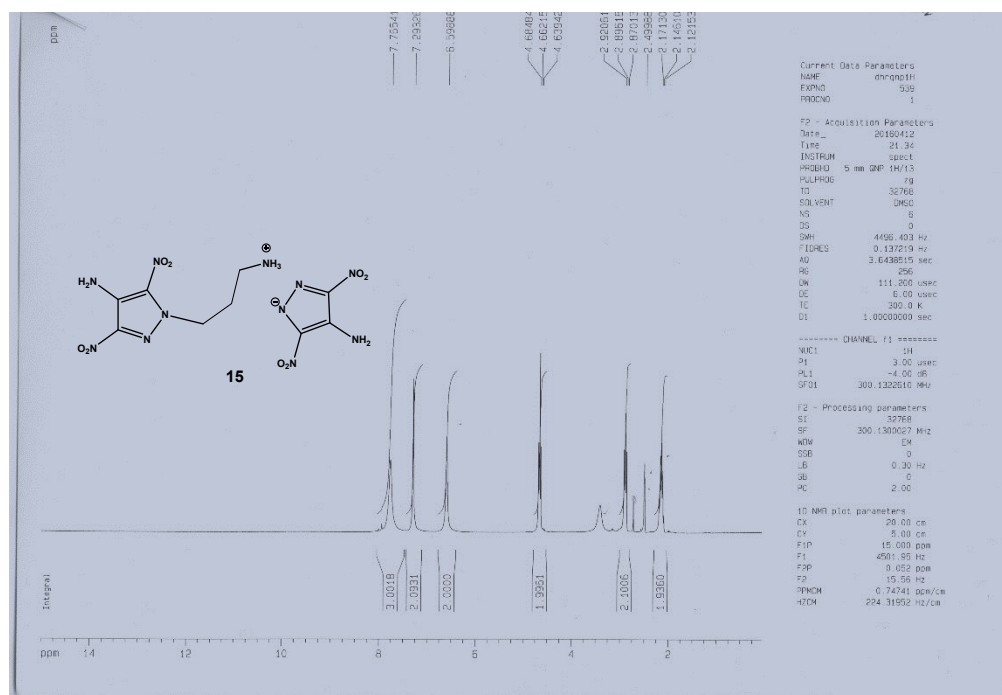

Fig S30:  $^1\text{H}$  NMR Spectrum of compound 15

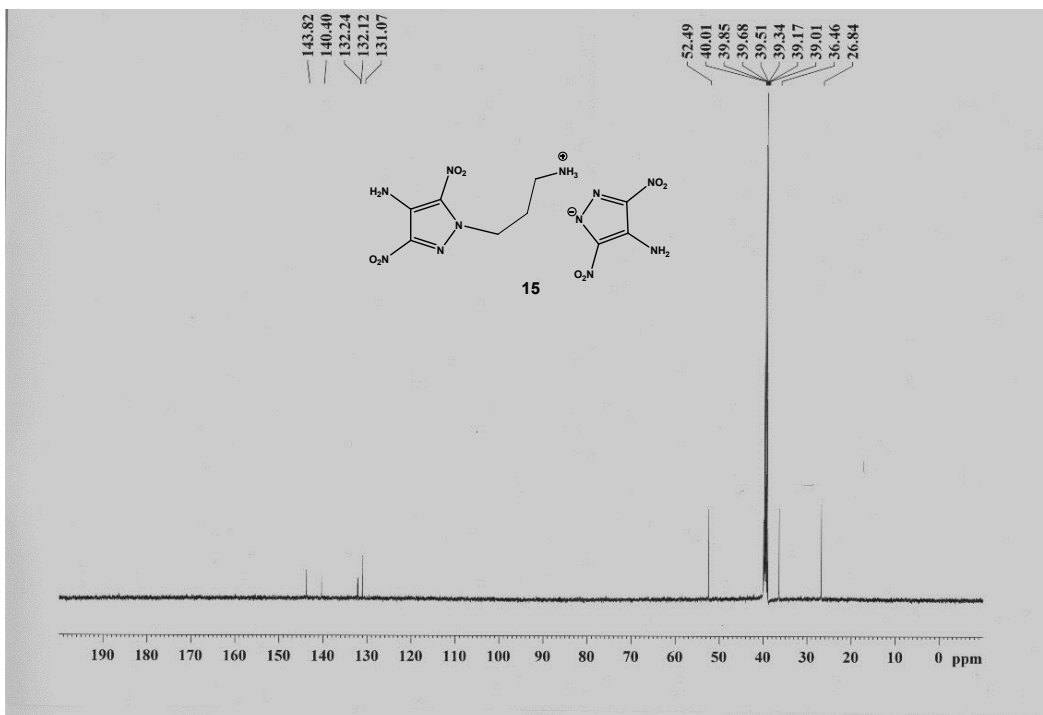

Fig S31:  $^{13}\text{C}\{^1\text{H}\}$  NMR Spectrum of compound **15**

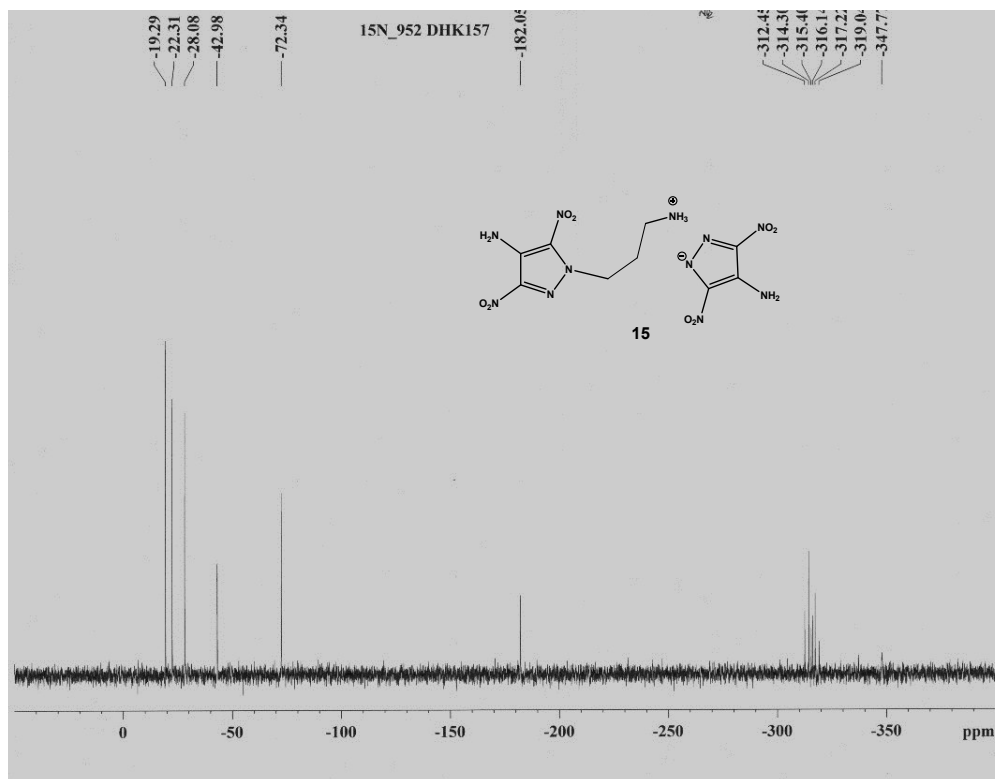

Fig S32:  $^{15}\text{N}$  NMR Spectrum of compound **15**

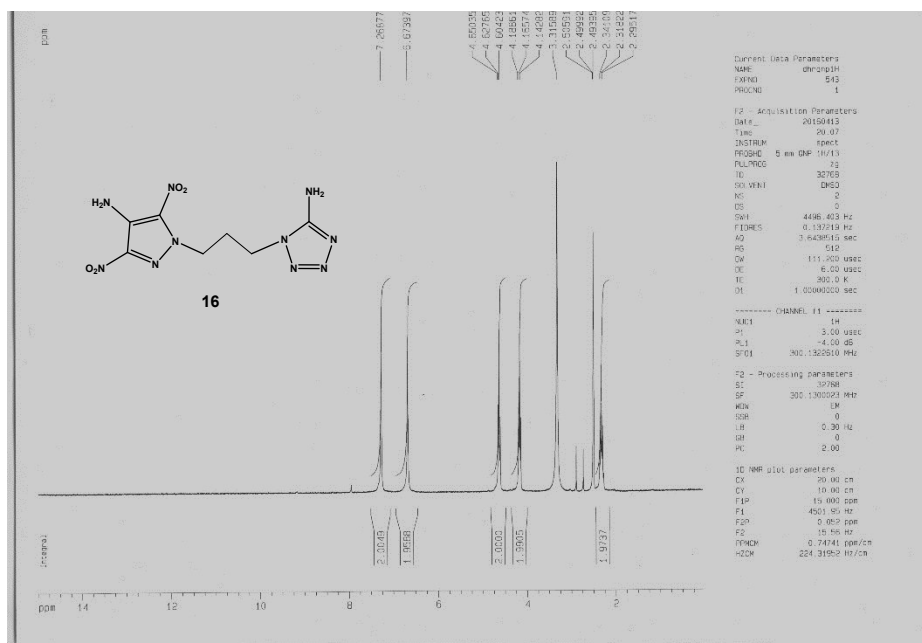

Fig S33:  $^1\text{H}$  NMR Spectrum of compound 16

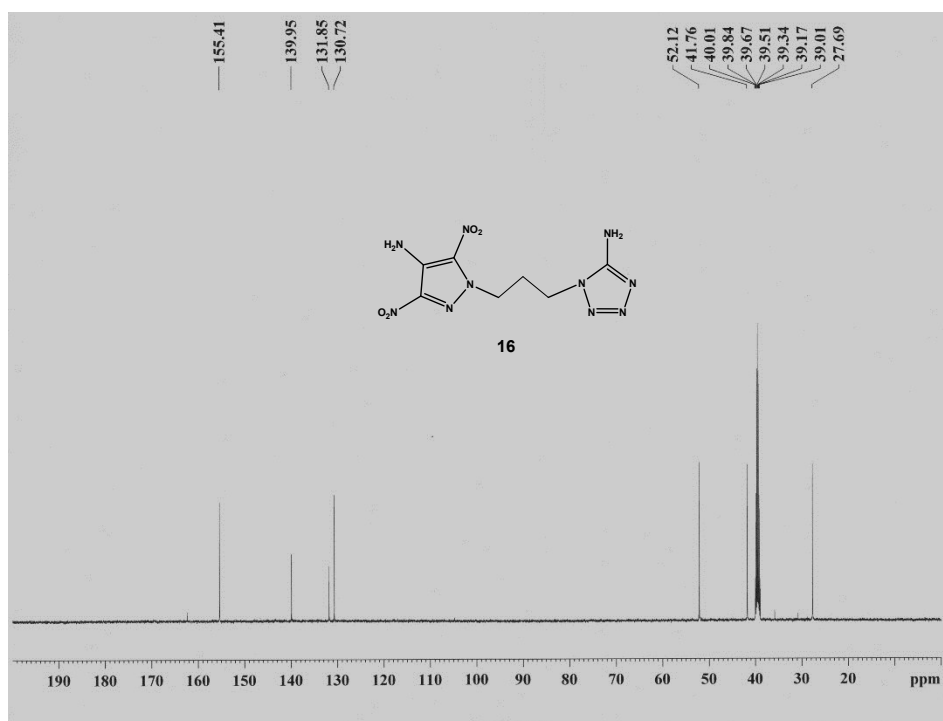

Fig S34:  $^{13}\text{C}\{^1\text{H}\}$  NMR Spectrum of compound 16

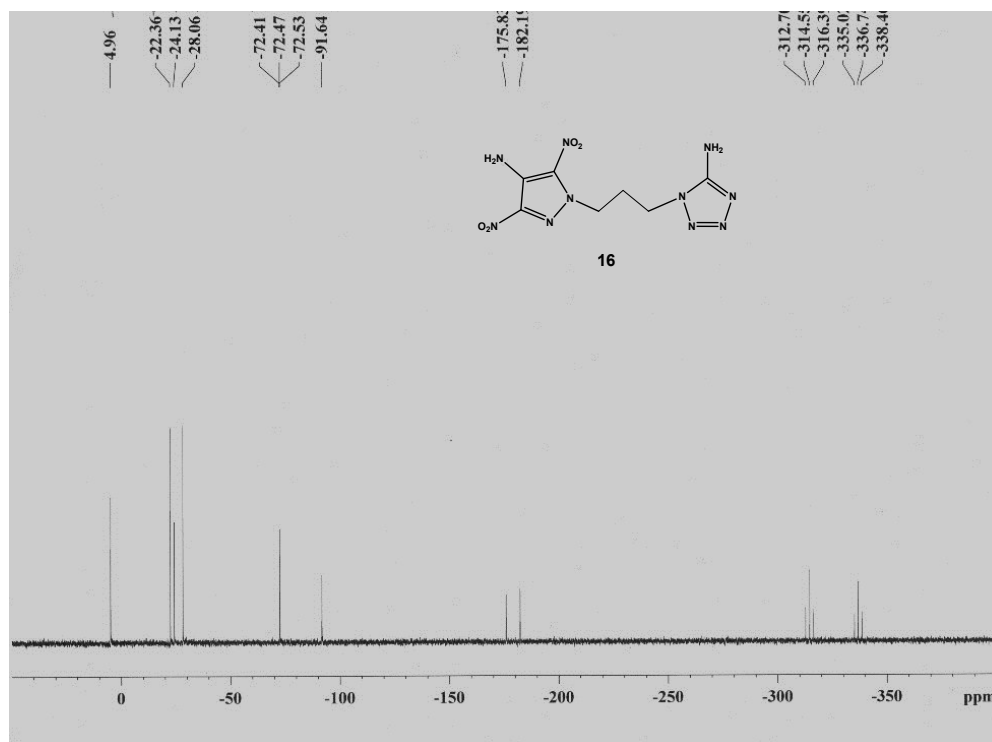

Fig S35: <sup>15</sup>N NMR Spectrum of compound 16

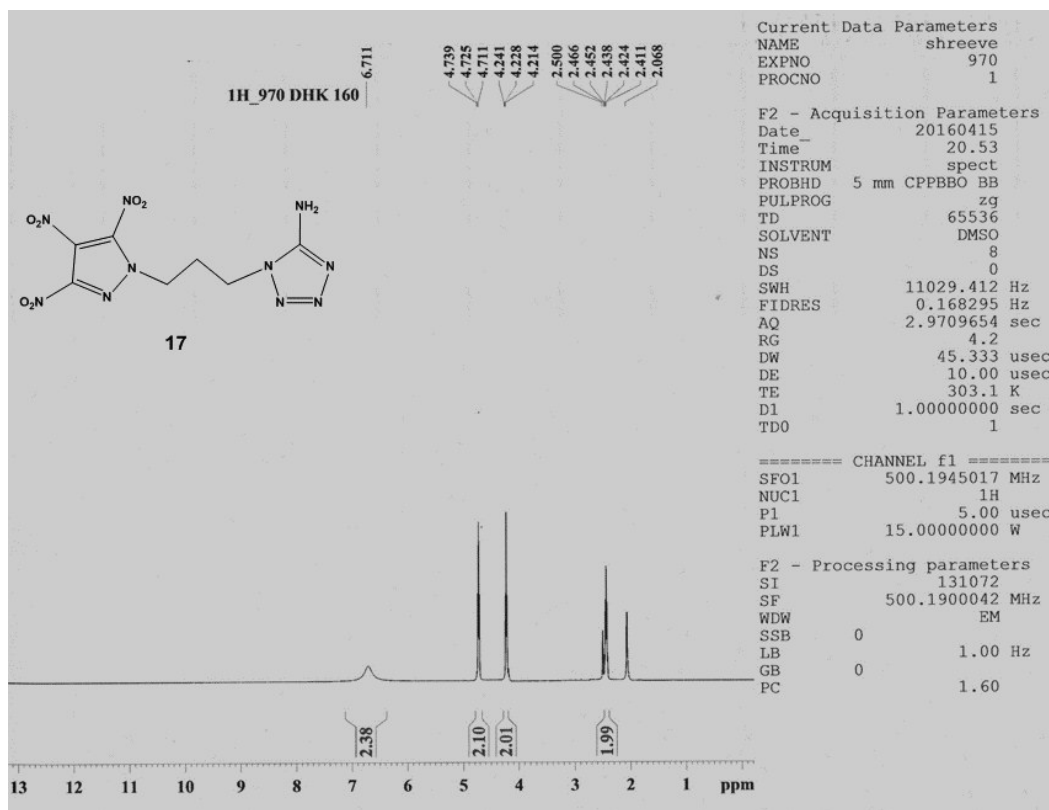

Fig S36: <sup>1</sup>H NMR Spectrum of compound 17

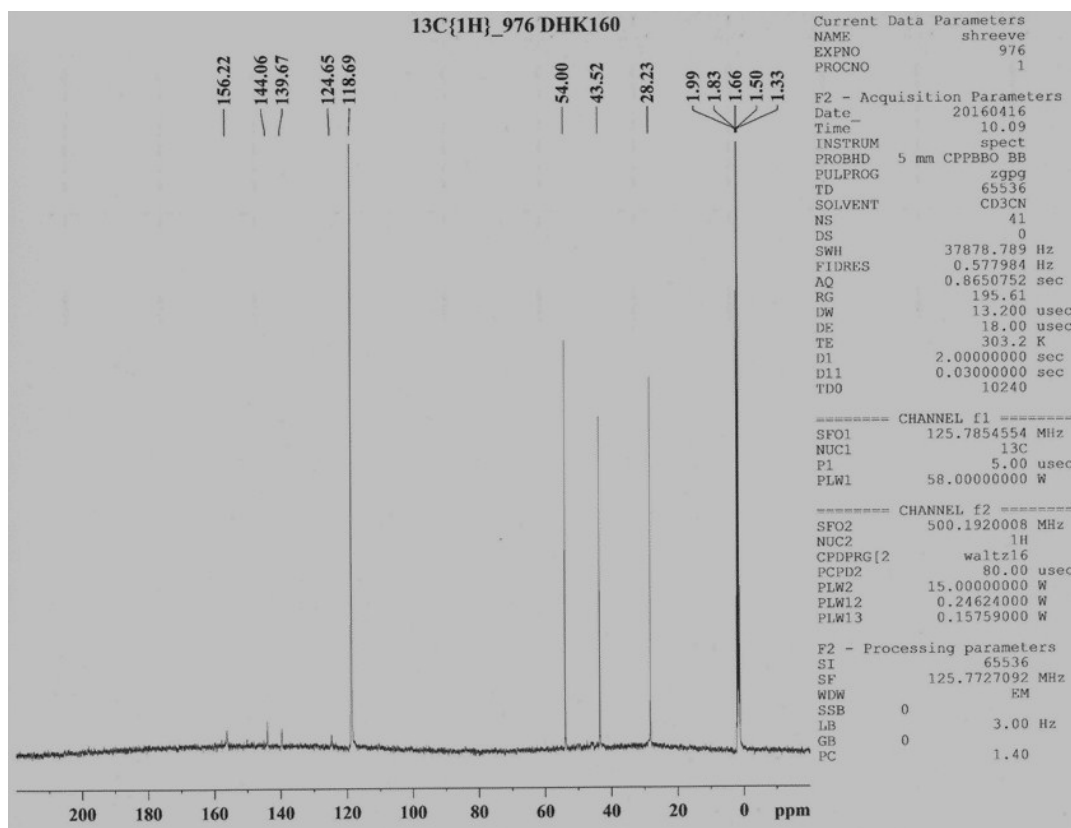

Fig S37:  $^{13}\text{C}\{^1\text{H}\}$  NMR Spectrum of compound **17**
